# Supplementary material for: Linking world bank development indicators and outcomes of congenital heart surgery in low-income and middle-income countries: retrospective analysis of quality improvement data
Source: PubMed Central journal article supplement — BMJ Open. 2019 Jun 22;9(6):e028307. doi: 10.1136/bmjopen-2018-028307 (PMC6596958; doi:10.1136/bmjopen-2018-028307), 2019-06-22
Supplement: bmjopen-2018-028307.draft_revisions.pdf [file bmjopen-2018-028307.draft_revisions.pdf]

# BMJ Open

BMJ Open is committed to open peer review. As part of this commitment we make the peer review history of every article we publish publicly available.

When an article is published we post the peer reviewers' comments and the authors' responses online. We also post the versions of the paper that were used during peer review. These are the versions that the peer review comments apply to.

The versions of the paper that follow are the versions that were submitted during the peer review process. They are not the versions of record or the final published versions. They should not be cited or distributed as the published version of this manuscript.

BMJ Open is an open access journal and the full, final, typeset and author-corrected version of record of the manuscript is available on our site with no access controls, subscription charges or pay-per-view fees (<http://bmjopen.bmj.com>).

If you have any questions on BMJ Open's open peer review process please email [info.bmjopen@bmj.com](mailto:info.bmjopen@bmj.com)

# BMJ Open

## Linking World Bank Development Indicators and Outcomes of Congenital Heart Disease Survival in Low- and Middle-Income Countries: a Retrospective Analysis of Quality Improvement Data

|                               |                                                                                                                                                                                                                                                                                                                                                                                                                                                                                                                                                                                                                                                                                                                                                                                                                                                                                                                                      |
|-------------------------------|--------------------------------------------------------------------------------------------------------------------------------------------------------------------------------------------------------------------------------------------------------------------------------------------------------------------------------------------------------------------------------------------------------------------------------------------------------------------------------------------------------------------------------------------------------------------------------------------------------------------------------------------------------------------------------------------------------------------------------------------------------------------------------------------------------------------------------------------------------------------------------------------------------------------------------------|
| Journal:                      | <i>BMJ Open</i>                                                                                                                                                                                                                                                                                                                                                                                                                                                                                                                                                                                                                                                                                                                                                                                                                                                                                                                      |
| Manuscript ID                 | bmjopen-2018-028307                                                                                                                                                                                                                                                                                                                                                                                                                                                                                                                                                                                                                                                                                                                                                                                                                                                                                                                  |
| Article Type:                 | Research                                                                                                                                                                                                                                                                                                                                                                                                                                                                                                                                                                                                                                                                                                                                                                                                                                                                                                                             |
| Date Submitted by the Author: | 30-Nov-2018                                                                                                                                                                                                                                                                                                                                                                                                                                                                                                                                                                                                                                                                                                                                                                                                                                                                                                                          |
| Complete List of Authors:     | Rahman, Sarah; Harvard College<br>Zheleva, Bistra; Children's HeartLink<br>Cherian, K.M.; Frontier Lifeline Hospital and Dr. KM Cherian Foundation<br>Christenson, Jan; University Hospital of Geneva, Secretary General<br>Global Forum on Humanitarian Medicine in Cardiology and Cardiac Surgery (GFHM)<br>Doherty, Kaitlin; Children's Hospital Boston<br>de Ferranti, David; Results for Development Institute<br>Gauvreau, Kimberlee; Children's Hospital Boston<br>Hickey, Patricia; Children's Hospital Boston<br>Kumar, Raman; Amrita Institute of Medical Sciences and Research Centre<br>Kupiec, Jennifer; Children's Hospital Boston<br>Novick, William; University of Tennessee Health Science Center-Global Surgery Institute and William Novick Global Cardiac Alliance<br>Sandoval, Nestor; Fundacion Cardioinfantil-Instituto de Cardiologia, Universidad del Rosario<br>Jenkins, Kathy; Children's Hospital Boston |
| Keywords:                     | PAEDIATRICS, SURGERY, Congenital heart disease < CARDIOLOGY, Paediatric cardiology < CARDIOLOGY                                                                                                                                                                                                                                                                                                                                                                                                                                                                                                                                                                                                                                                                                                                                                                                                                                      |
|                               |                                                                                                                                                                                                                                                                                                                                                                                                                                                                                                                                                                                                                                                                                                                                                                                                                                                                                                                                      |

SCHOLARONE™  
Manuscripts

## Linking World Bank Development Indicators and Outcomes of Congenital Heart Disease Survival in Low- and Middle-Income Countries: a Retrospective Analysis of Quality Improvement Data

Sarah Rahman, AB,<sup>a</sup> Bistra Zheleva, MBA,<sup>i</sup> K.M. Cherian MD,<sup>b</sup> Jan T. Christenson, MD,<sup>c</sup> Kaitlin Doherty BS,<sup>d</sup> David de Ferranti, PhD,<sup>e</sup> Kimberlee Gauvreau, ScD,<sup>d</sup> Patricia A. Hickey, PhD, Raman Krishna Kumar DM<sup>f</sup>, Jennifer Koch Kupiec, MPH<sup>d</sup>, William M. Novick, MD<sup>g</sup>, Nestor F. Sandoval, MD,<sup>h</sup> Kathy J. Jenkins MD<sup>d</sup>

- a. Harvard University, Cambridge, MA
- b. Frontier Lifeline Hospital and Dr. KM Cherian Foundation, Mogappair, Tamil Nadu, India
- c. University Hospital of Geneva, Secretary General Global Forum on Humanitarian Medicine in Cardiology and Cardiac Surgery (GFHM) Geneva, Switzerland
- d. Boston Children's Hospital, Boston, MA
- e. Results for Development, Washington, DC
- f. Amrita Institute of Medical Sciences, Kochi, India
- g. University of Tennessee Health Science Center-Global Surgery Institute and William Novick Global Cardiac Alliance, Memphis, TN
- h. Fundacion Cardioinfantil-Instituto de Cardiologia, Universidad del Rosario, Bogota, Colombia
- i. Children's HeartLink, Edina, MN

Correspondence to: Dr. Kathy Jenkins  
Boston Children's Hospital  
300 Longwood Avenue  
Boston, MA 02115  
[Kathy.Jenkins@cardio.chboston.org](mailto:Kathy.Jenkins@cardio.chboston.org)  
(617) 355-7275

Word Count: 3161

### Abstract

**Objective:** Many Low- and Middle-Income Countries (LMICs) struggle to provide the health services investment required for life-saving Congenital Heart Disease (CHD) surgery. We explored associations between risk-adjusted CHD surgical mortality from 17 LMICs and global development indices to identify patterns that might inform investment strategies.

**Design:** A retrospective analysis. Country-specific Standardized Mortality Ratios were graphed against global development indices reflective of wealth and healthcare investment. Spearman correlation coefficients were calculated.

**Setting and Participants:** The International Quality Improvement Collaborative (IQIC) keeps a volunteer registry of outcomes of CHD surgery programs in low resource settings. Inclusion in the IQIC is voluntary enrollment by hospital sites. Patients in the registry underwent congenital heart surgery. Sites that actively participated in IQIC in 2013, 2014, or 2015 and passed a 10%

1  
2  
3 data audit were asked for permission to share data for this study. 31 sites in 17 countries are  
4 included.  
5

6  
7 Outcome Measures: In-hospital mortality. Standardized Mortality Ratios were calculated. Risk-  
8 adjustment for in-hospital mortality uses the RACHS method, a model including surgical risk  
9 category, age group, prematurity, presence of a major non-cardiac structural anomaly, and  
10 multiple congenital heart procedures during admission.  
11

12 Results: The IQIC registry includes 24,917 congenital heart surgeries performed in children <18  
13 years of age. The overall in-hospital mortality rate was 5.0 %. Country-level congenital heart  
14 surgery Standardized Mortality Ratios were negatively correlated with Gross Domestic Product  
15 (GDP) per capita ( $r = -0.34$ ,  $p = 0.18$ ), and health expenditure per capita ( $r = -0.23$ ,  $p = 0.37$ ) and  
16 positively correlated with under-5 mortality ( $r = .60$ ,  $p = .01$ ) and undernourishment ( $r = 0.39$ ,  
17  $p = 0.17$ ). Countries with lower development had wider variation in mortality. GDP is a key driver  
18 of the association between other measures and mortality.  
19  
20

21 Conclusions: Results display a moderate relationship between wealth, healthcare investment and  
22 malnutrition, with significant variation, including superior results in many countries with low  
23 GDP. These findings provide context and optimism for investment in CHD procedures in low  
24 resource settings.  
25  
26

### 27 **Strengths and Limitations of This Study**

28  
29  
30

- 31 • This study uses data from the International Quality Improvement Collaborative for  
32 Congenital Heart Disease (IQIC), which offers a unique opportunity to study outcomes  
33 from low- and middle-income regions where little is known about outcomes for  
34 congenital heart surgery.  
35  
36
- 37 • This is the first study to directly compare development and investment to congenital heart  
38 surgery outcomes.  
39  
40
- 41 • This study adds context to the discussion of national investment in tertiary care in general  
42 and for congenital heart surgery in specific emerging economies.  
43  
44
- 45 • Study sample size is limited by the number of participants in IQIC.  
46  
47
- 48 • The study examines country-level outcomes, which may not reflect regional variability.  
49  
50  
51  
52  
53  
54  
55  
56  
57  
58  
59  
60

## INTRODUCTION

In 2015, more than 150 world leaders at the United Nations agreed to adopt the 17 Sustainable Development Goals (SDGs) calling for a sustained investment globally to achieve a number of targets aiming at eradicating poverty and inequality, take action on climate change and the environment, improve access to health and education, and build strong institutions and partnerships.(1) Of particular importance is SDG3, ensure healthy lives and promote well-being for all at all ages and its demanding target to reduce neonatal mortality to at least as low as 12 per 1,000 live births and under-5 mortality to at least as low as 25 per 1,000 live births by 2030. Recent studies show that congenital anomalies, of which heart disease represents nearly half, are the fourth leading cause of neonatal deaths, especially for countries with lower overall childhood mortality,(2) which tend to be middle-, upper-middle- and high-income countries. Congenital Heart Disease (CHD) can also be a significant contributor to poverty as families can incur catastrophic health costs if care is not covered by health insurance.

Surgery for congenital heart disease requires substantial resources, and a highly specialized healthcare infrastructure. Low-and middle-income countries lack both access to care and capacity to perform congenital heart surgeries safely and effectively. Less developed countries have disproportionately higher amount of congenital heart disease per million Gross Domestic Product (GDP) compared to more economically developed countries.(3) In some cases, even countries that fall in the high-income group, or higher income regions within a country, struggle with allocating appropriate resources to CHD services. For example, Argentina is typically classified as high-income, but chose to be in the International Quality Improvement Collaborative because they felt they struggled with similar problems as LMICs for congenital heart surgery.

Literature has examined general surgical mortality in low- and middle-income countries, but to date, no studies have examined congenital heart surgery mortality in a comparative context to development. Lebrun et al. surveyed hospitals in multiple low income countries and found limited operative capacity for surgery with most countries having less than one surgeon or anesthesiologist per 100,000 population.(4) Bainbridge et al. found that in a mixed surgical population, perioperative mortality declined from the 1970s to 2011, especially in developing countries.(5) Hsuing and Abdallah highlight the need for more data on funding of paediatric surgery in LMICs.(6)

An analysis of congenital heart surgery outcomes within low- and middle-income countries adds context to the efforts of countries to reduce mortality for congenital heart disease. We retrospectively explored associations between risk-adjusted in-hospital survival after congenital heart surgery at the country level and indicators of national development and healthcare investment among low-and middle-income countries participating in an international quality improvement collaborative aimed at reducing congenital heart surgery mortality.

## **METHODS**

### **Congenital Heart Surgery Outcomes**

The International Quality Improvement Collaborative for Congenital Heart Disease (IQIC) collects surgical outcome data from participating centers in low-resource-settings around the world. The IQIC aims to reduce mortality for congenital heart surgery by collaborating with local sites to implement quality improvement strategies such as perioperative communication, infection reduction, and team-based practice.(7) The IQIC began collecting data in 2008 from five sites and has since grown to 64 sites across 25 countries in 2018. The database is housed at Boston Children's Hospital.

1  
2  
3 Outcome data (in-hospital mortality) in the IQIC registry was collected by individual  
4 programs on paediatric congenital heart surgeries performed at each site. Inclusion in the IQIC is  
5 voluntary enrollment by hospital sites. Patients included in the registry underwent congenital  
6 heart surgery. Sites that actively participated in IQIC in 2013, 2014, or 2015 and successfully  
7 passed a 10% data audit were asked for permission to share data for this study. A total of 31  
8 sites in 17 countries (Afghanistan, Argentina, Brazil, China, Colombia, Costa Rica, Guatemala,  
9 India, Malaysia, Mexico, Pakistan, Peru, Russia, Serbia, Uganda, Ukraine, and Vietnam) chose  
10 to participate.  
11  
12  
13  
14  
15  
16  
17  
18  
19  
20  
21  
22

### 23 **Development Indicators**

24  
25  
26 The 2014 country-level development indicators are drawn from the publicly available World  
27 Bank World Development Indicators database.<sup>(8)</sup> Eight variables are included as indicators of  
28 country development and investment in health: Gross Domestic Product (GDP) per capita, health  
29 expenditure per capita, under-5 mortality rate, poverty headcount ratio at \$5.50 per day,  
30 prevalence of undernourishment, life expectancy at birth, domestic general government health  
31 expenditure (% of GDP), and specialist surgical workforce (per 100,000 population).  
32  
33  
34  
35  
36  
37  
38  
39

40 GDP per capita (in constant 2010 US\$) is the sum of gross value added by all resident  
41 producers (plus taxes, minus subsidies) divided by midyear population.<sup>(8)</sup> Health expenditure  
42 per capita (in current US\$) is the sum of public and private health expenditures as a ratio of total  
43 population.<sup>(8)</sup> Prevalence of undernourishment is the percentage of the population whose food  
44 intake is insufficient to meet dietary energy requirements continuously.<sup>(8)</sup> Poverty headcount  
45 ratio is internationally comparable measure of the percentage of the population with income less  
46 than \$5.50 a day (2011 international prices).<sup>(8)</sup> The under-5 mortality rate (per 1,000 live births)  
47  
48  
49  
50  
51  
52  
53  
54  
55  
56  
57  
58  
59  
60

1  
2  
3 is the probability that a newborn baby will die before reaching age five, based on age-specific  
4 mortality rates of that year.(8) Life expectancy measures years of life for a newborn given  
5 current mortality patterns remain throughout their life.(8) Domestic general government health  
6 expenditure is the amount of public expenses on health as a share of the economy (GDP). (8)  
7  
8 Specialist surgical workforce is the number of specialist surgical, anesthetic, and obstetric  
9 providers (per 100,000 of population). (8)  
10  
11  
12  
13  
14  
15

### 16 **Data Analysis**

17  
18  
19  
20 We completed a retrospective analysis of IQIC registry data. For each country, we used the  
21 IQIC registry to determine the total number of cases of congenital heart surgery in children less  
22 than 18 years of age over the three-year period 2013-2015. The observed in-hospital mortality  
23 rate was calculated as the number of deaths occurring prior to hospital discharge divided by the  
24 total number of RACHS-classified surgical cases. The Risk Adjustment for Congenital Heart  
25 Surgery (RACHS) model is used to evaluate differences in mortality among groups of patients  
26 undergoing congenital heart surgery.(9) The outcome measure used is a Standardized Mortality  
27 Ratio (SMR) for each country, defined as the observed in-hospital mortality rate divided by the  
28 mortality rate that would be expected given the country's patient case mix. The expected in-  
29 hospital mortality rate was calculated using the previously validated RACHS risk adjustment  
30 method (7,10). The model included surgical risk category (categories 1 through 6, where 1  
31 represents surgical procedures with the lowest risk for in-hospital mortality and 6 the highest),  
32 age group ( $\leq 30$  days, 31 days to  $< 1$  year, 1 to 17 years), prematurity ( $< 37$  weeks), presence of a  
33 major non-cardiac structural anomaly, and multiple congenital heart procedures during the  
34 admission. The RACHS method was developed using U. S. outcomes data, but since the  
35 inception of the IQIC in 2008 has been successfully applied to LMICs.(7) An SMR greater than  
36  
37  
38  
39  
40  
41  
42  
43  
44  
45  
46  
47  
48  
49  
50  
51  
52  
53  
54  
55  
56  
57  
58  
59  
60



1  
2  
3 1.0 suggests higher than expected mortality based on patient case mix, while an SMR less than  
4  
5 1.0 represents lower than expected mortality. Two-way scatter plots were used to examine the  
6  
7 relationships between SMR and each development indicator; the strength of these relationships  
8  
9 was quantified using Spearman correlation coefficients. We also used linear regression analysis  
10  
11 to compare unadjusted regression coefficients relating each development indicator to SMR to  
12  
13 coefficients adjusted for GDP per capita. The natural log of SMR was used as the outcome for  
14  
15 these models since SMR itself was not normally distributed. Furthermore, we completed a  
16  
17 stratified analysis between low complexity cases (RACHS categories 1 and 2) and high  
18  
19 complexity cases (RACHS categories 3-6) and SMR. To do this, for each country we calculated  
20  
21 a SMR for RACHS 1-2 and a SMR for RACHS 3-6 and compared correlations between the low  
22  
23 RACHS SMR and each development indicator with the high RACHS SMR and each  
24  
25 development indicator.  
26  
27  
28  
29

30  
31 The institutional review board at Boston Children's Hospital gave permission for the  
32  
33 IQIC data registry to be used for this research. Study data were collected and managed using  
34  
35 REDCap electronic data capture tools hosted at Boston Children's Hospital.(11) REDCap  
36  
37 (Research Electronic Data Capture) is a secure, web-based application designed to support data  
38  
39 capture for research studies, providing 1) an intuitive interface for validated data entry; 2) audit  
40  
41 trails for tracking data manipulation and export procedures; 3) automated export procedures for  
42  
43 seamless data downloads to common statistical packages; and 4) procedures for importing data  
44  
45 from external sources. The senior author had complete access to the registry data, and the authors  
46  
47 are responsible for the study design, analysis and interpretation of data, and the decision to  
48  
49 submit the paper for publication.  
50  
51  
52  
53  
54  
55  
56  
57  
58  
59  
60

## RESULTS

Among 31 programs in 17 countries, the IQIC database included 24,917 congenital heart surgeries performed in children <18 years of age. The number of programs per country ranged from one to six. The overall in-hospital mortality rate was 5.0 % and country-level mortality rate ranged from 1.7% to 25.0%. The age and RACHS category distribution of cases by country is shown in online supplementary Tables 1 and 2. The full RACHS model used to calculate country SMRs is shown in online supplementary Table 3.

Country SMRs range from 0.40 to 4.85. Unadjusted mortality rates and Standardized Mortality Rates by country are shown in online supplemental Figure 1. Correlation coefficients between each development index and SMR and regression coefficients, both unadjusted and adjusted by GDP per capita, by country are shown in Table 1.

**Table 1. Correlation and Regression Coefficients for Development Indicators with SMR**

| Indicator                                      | Number of Countries | Correlation Coefficient | Unadjusted Regression Coefficient | Regression Coefficient adjusted for GDP per capita |
|------------------------------------------------|---------------------|-------------------------|-----------------------------------|----------------------------------------------------|
| GDP per capita                                 | 17                  | r=-0.34                 | -0.047                            | --                                                 |
| Health Expenditure per capita                  | 17                  | r= -0.23                | -0.035                            | 0.092                                              |
| Undernourishment                               | 14 <sup>#</sup>     | r=0.39                  | 0.40                              | 0.78                                               |
| Under-5 Mortality Rate                         | 17                  | r=.60*                  | 0.13*                             | 0.16                                               |
| Poverty Headcount Ratio at \$5.50 a day        | 11 <sup>#</sup>     | r=0.26                  | 0.12                              | 0.19                                               |
| Life Expectancy                                | 17                  | r= -0.35                | -0.50                             | -0.49                                              |
| Domestic General Government Health Expenditure | 17                  | r=-0.22                 | -0.0937                           | -0.0297                                            |
| Specialist Surgical Workforce                  | 11 <sup>#</sup>     | r=-0.56                 | -0.0737                           | -0.0515                                            |

# World Bank index not available for some countries

\*significant at  $p < 0.05$

P-values: GDP correlation  $p = 0.18$ , unadjusted regression coefficient  $p = .29$ , Health Expenditure correlation  $p = 0.37$ , unadjusted regression  $p = 0.55$ , adjusted regression  $p = 0.47$ , Undernourishment correlation  $p = 0.17$ , unadjusted regression  $p = 0.14$ , adjusted regression  $p = 0.20$ , Under-5 Mortality Rate correlation  $p = 0.01$ , unadjusted regression  $p = 0.04$ , adjusted regression  $p = 0.08$ , Poverty Headcount ratio correlation  $p = 0.43$ , unadjusted regression  $p = 0.46$ , adjusted regression  $p = 0.33$ , Life Expectancy correlation  $p = 0.16$ , unadjusted regression  $p = 0.11$ , adjusted regression  $p = 0.24$ , Domestic General Government Health Expenditure correlation  $p = 0.40$ , unadjusted regression  $p = 0.41$ , adjusted regression  $p = 0.84$ . Specialist Surgical Workforce  $p = 0.07$ , unadjusted regression  $p = 0.26$ , adjusted regression  $p = 0.45$ .

Graphs showing the relationship between SMR by country and GDP per capita, health expenditure per capita, poverty headcount ratio, and specialist surgical workforce are shown in Figures 1-4 respectively. Graphs showing the relationship between SMR and other development indicators are shown in online supplemental figures 2-5.

Stratified analysis comparing congenital heart surgery mortality ratios from low complexity cases (low RACHS categories, 1-2) and high complexity cases (high RACHS categories, 3-6) are shown in online supplemental table 4. The low RACHS score SMR correlation largely mirror the overall SMR Spearman correlation, while the high RACHS score SMR has a lower correlation than the low RACHS score SMR with each development indicator except poverty headcount ratio and specialist surgical workforce.

## DISCUSSION

We found negative associations of GDP per capita, Health Expenditure per capita, Domestic Government Health Expenditure, Specialist Surgical Workforce, and Life Expectancy with congenital heart surgery SMR: as these indicators increase, SMR decreases. We found positive

1  
2  
3 associations of Poverty Headcount and Undernourishment with SMR: as poverty headcount or  
4  
5 undernourishment increases, SMR increases. We also found the expected positive correlation  
6  
7 between under-5 mortality and SMR, which was statistically significant. The association of  
8  
9 GDP per capita and SMR suggests that overall development of a country may be an important  
10  
11 component of surgical mortality, even more so than Health Expenditure per capita. The  
12  
13 borderline statistically significant negative correlation between specialist surgical workforce and  
14  
15 CHD mortality suggests that adequate workforce is integral to quality congenital heart surgical  
16  
17 capacity. While most associations do not reach statistical significance, they display links between  
18  
19 development and surgery outcomes.  
20  
21  
22

23  
24 Although these associations exist, a crucial finding of this study is that there is still substantial  
25  
26 variation between countries in SMRs even at similar development levels. For example,  
27  
28 Afghanistan and Pakistan have much higher SMRs than India, although they are at similar GDP  
29  
30 per capita levels. Nations with high levels of conflict such as Afghanistan may have stressed  
31  
32 health systems as a whole,(12,13) which would impact congenital heart surgery services.  
33  
34 Similarly, Peru, Serbia and China are at similar GDP per capita levels yet vary widely in  
35  
36 mortality, with China at the lowest SMR. China has a well-organized and efficient health system  
37  
38 that likely contributes to better outcomes. (14) Although Peru appears to be an outlier, it is not  
39  
40 influential – meaning it does not have a substantial impact on the correlation coefficients – with  
41  
42 the exception of the association between SMR and undernourishment and SMR and specialist  
43  
44 surgical workforce (both associations become stronger without Peru).  
45  
46  
47  
48

49  
50 When adjusting for GDP per capita, regression coefficients decrease in magnitude for most  
51  
52 indicators—health expenditure, poverty, life expectancy, and under-5 mortality. Therefore, the  
53  
54 data indicates that GDP per capita is a main driver of the association between these indicators  
55  
56  
57  
58  
59  
60

1  
2  
3 and congenital heart surgery mortality. However, the regression coefficient for  
4  
5 undernourishment increases when controlling for GDP per capita, suggesting that population-  
6  
7 wide undernourishment affects mortality after congenital heart surgery independently of GDP.  
8  
9 This may be reflective of the higher likelihood of children undergoing CHD surgery while  
10  
11 malnourished in countries where malnourishment is more prevalent, and potentially higher risk  
12  
13 of death in such circumstances.(15–17)  
14  
15

16  
17 Comparative analysis of low RACHS SMRs with development indicators and high  
18  
19 RACHS SMRs with development indicators display that low RACHS SMRs correlations are  
20  
21 similar to the overall SMR correlations and thus may contribute more to the overall correlation  
22  
23 than high RACHS cases. Notably, high RACHS cases SMRs have a stronger correlation with  
24  
25 poverty headcount ratio and with specialist surgery workforce than low RACHS cases SMRs,  
26  
27 suggesting that low poverty and a present specialist surgery workforce are more important for  
28  
29 positive outcomes in high complexity cases.  
30  
31  
32

33 As poverty and infectious diseases decrease, non-communicable diseases such as congenital  
34  
35 heart disease in LMICs account for a greater percentage of childhood deaths. Congenital defects  
36  
37 represented 8.7% of global under-5 mortality in 2016.(18) Many stakeholders believe congenital  
38  
39 heart surgery should be considered an “Essential Paediatric Surgical Procedure” due to the  
40  
41 economic value of these surgeries in a community.(19) A substantial fraction (58%) of  
42  
43 congenital heart defect burden (avertable disability years) could be alleviated with scaled up  
44  
45 congenital heart surgery programs in low-and-middle-income countries.(20) Quality in high-  
46  
47 specialty care is of paramount importance. A recent study estimated that cardiovascular diseases  
48  
49 are the highest contributor to amenable mortality due to poor-quality care.(21) Quality tertiary  
50  
51 care requires trained personnel and equipment and infection control.(22) Recommended  
52  
53  
54  
55  
56  
57  
58  
59  
60

1  
2  
3 strategies to improve surgical care include training and basic infrastructure and equipment,(23)  
4  
5 which necessitates investment in healthcare systems.  
6

7  
8 Our method has several limitations. First, the sample size is only 17 countries and 31 sites  
9  
10 (for some indicators, fewer), which limits statistical power, and may be why most associations,  
11  
12 except under-5 mortality were not significant. Second, data are analyzed at the country-level but  
13  
14 using facility-based clinical outcomes data from selected centers that participate in IQIC, which  
15  
16 may not be representative of countrywide outcomes for CHD surgery. As a surgical quality  
17  
18 improvement database, the IQIC collects data for in-hospital mortality and does not capture  
19  
20 longer-term outcomes, therefore does not represent the broader socioeconomic factors that may  
21  
22 affect survival from CHD surgery (24) and that could have been collected with a more  
23  
24 population health focused database. IQIC sites are often large academic tertiary hospitals, and  
25  
26 IQIC members are willing and able to collect data and participate in quality improvement  
27  
28 activities. That may mean that sometimes hospital settings represented in this study do not  
29  
30 always mirror the overall development level of their countries. However, most high-income  
31  
32 countries tend to regionalize CHD surgical centers in several large urban areas, to avoid the  
33  
34 creation of many small-volume centers. (25) Therefore, even though the overall quality of care of  
35  
36 the health systems may be low, the centers themselves may have quite good CHD surgical  
37  
38 outcomes. Country-level SMRs may also not accurately reflect regional variability in level of  
39  
40 development or resources available for congenital heart surgery, especially in large countries  
41  
42 such as China and India. For example, the sites in India are mostly from states in Southern India,  
43  
44 which tend to have higher development levels than the Northern part of the country. There may  
45  
46 also be variations in case mix of participating institutions due to gaps in the existing diagnosis  
47  
48 and referral networks, healthcare financing, and social and cultural factors that may result in not  
49  
50  
51  
52  
53  
54  
55  
56  
57  
58  
59  
60

1  
2  
3 treating the patients with the most severe disease, which may not be completely accounted for in  
4 risk-adjustment models. Regional differences in healthcare financing for CHD surgery and in-  
5 hospital care, including public and private insurance, is a particularly important factor not  
6 examined in this study, since care becomes unaffordable to most families if is not included in  
7 universal health insurance coverage package. On the other hand, institutions too could  
8 potentially suffer financial losses if reimbursement for CHD surgery is not at the appropriate  
9 level. Finally, our study only evaluates outcomes for children who underwent congenital heart  
10 surgery, and does not capture outcomes for children who did not have access to operations.  
11 Outcomes for these children are also likely associated with development and investment.  
12  
13  
14  
15  
16  
17  
18  
19  
20  
21  
22  
23

24 In conclusion, our results show correlations between various development indicators and  
25 congenital heart surgery mortality. Nonetheless, there is variation among countries of similar  
26 GDP levels, and lower risk-adjusted mortality in some countries with lower development offers  
27 hope and encourages investment in congenital heart surgery programs. Our findings can be  
28 helpful for national and sub-national planning by countries committed to achieving the SDGs,  
29 especially SDG3 target of ending preventable deaths of newborns and children under 5 years of  
30 age. As they consider development of different paediatric services, this study can give them  
31 guidance on areas they could invest in. Further study is required to truly understand why  
32 countries with similar development levels vary in congenital heart surgery mortality. Future  
33 studies ought to investigate why such variations exist, and examine the role of governments,  
34 NGOs or other stakeholders, training and retention of skilled professionals and other personnel,  
35 and infection control practices in particular countries. This inquiry can help establish effective  
36 strategies for successful congenital heart surgical programs in low- and middle-income countries.  
37  
38  
39  
40  
41  
42  
43  
44  
45  
46  
47  
48  
49  
50  
51  
52  
53

## 54 **Abbreviations**

55  
56  
57  
58  
59  
60

|    |       |                                                                              |
|----|-------|------------------------------------------------------------------------------|
| 1  |       |                                                                              |
| 2  |       |                                                                              |
| 3  | CHD   | Congenital Heart Disease                                                     |
| 4  |       |                                                                              |
| 5  |       |                                                                              |
| 6  | GDP   | Gross Domestic Product                                                       |
| 7  |       |                                                                              |
| 8  |       |                                                                              |
| 9  | IQIC  | International Quality Improvement Collaborative for Congenital Heart Disease |
| 10 |       |                                                                              |
| 11 |       |                                                                              |
| 12 | LMICs | Low- and Middle-Income Countries                                             |
| 13 |       |                                                                              |
| 14 |       |                                                                              |
| 15 | NGO   | Non-Governmental Organization                                                |
| 16 |       |                                                                              |
| 17 |       |                                                                              |
| 18 | SDGs  | Sustainable Development Goals                                                |
| 19 |       |                                                                              |
| 20 |       |                                                                              |
| 21 | SMR   | Standardized Mortality Ratio                                                 |
| 22 |       |                                                                              |
| 23 |       |                                                                              |
| 24 | RACHS | Risk Adjustment for Congenital Heart Surgery                                 |
| 25 |       |                                                                              |
| 26 |       |                                                                              |

### Contributors

SR and KJ had the primary responsibility to design the study and write the manuscript. BZ, KMC, JTC, KD, KG, PAH, RKK, JKK, WN, NS, and KJ coordinated the global study data concept and collection. BZ revised multiple manuscript drafts, and DF interpreted data. KG conducted statistical analyses.

### Declaration of Interests

We declare no competing interests.

### Acknowledgements

This work has been published as a conference abstract at the American College of Cardiology and presented at The Global Forum on Humanitarian Medicine in Cardiology and Cardiac Surgery.

### Funding

Funding was received from Kobren Family Chair for Patient Safety and Quality, Harvard University Summer Undergraduate Research in Global Health, and Harvard College Research Program.

### Data Sharing Statement

Extra data is available by emailing the corresponding author.

### References

1. Sustainable development goals - United Nations [Internet]. United Nations Sustainable Development. [cited 2018 May 21]. Available from: <https://www.un.org/sustainabledevelopment/sustainable-development-goals/>



- 1
  - 2
  - 3
  - 4
  - 5
  - 6
  - 7
  - 8
  - 9
  - 10
  - 11
  - 12
  - 13
  - 14
  - 15
  - 16
  - 17
  - 18
  - 19
  - 20
  - 21
  - 22
  - 23
  - 24
  - 25
  - 26
  - 27
  - 28
  - 29
  - 30
  - 31
  - 32
  - 33
  - 34
  - 35
  - 36
  - 37
  - 38
  - 39
  - 40
  - 41
  - 42
  - 43
  - 44
  - 45
  - 46
  - 47
  - 48
  - 49
  - 50
  - 51
  - 52
  - 53
  - 54
  - 55
  - 56
  - 57
  - 58
  - 59
  - 60
2. Liu L, Oza S, Hogan D, et al. Global, regional, and national causes of under-5 mortality in 2000–15: an updated systematic analysis with implications for the Sustainable Development Goals. *The Lancet*. 2016;388(10063):3027–3035.
  3. A Case for the Invisible Child: Childhood Heart Disease and the Global Health Agenda [Internet]. *Children’s HeartLink*; 2015 [cited 2018 Jan 25]. Available from: <https://childrensheartlink.org/wp-content/uploads/2017/06/The-Invisible-Child-Brief-1.pdf>
  4. LeBrun DG, Chackungal S, Chao TE, et al. Prioritizing essential surgery and safe anesthesia for the Post-2015 Development Agenda: Operative capacities of 78 district hospitals in 7 low- and middle-income countries. *Surgery*. 2014 Mar 1;155(3):365–73.
  5. Bainbridge D, Martin J, Arango M, et al. Perioperative and anaesthetic-related mortality in developed and developing countries: a systematic review and meta-analysis. *The Lancet*. 2012 Sep 22;380(9847):1075–81.
  6. Hsiung G, Abdullah F. Financing pediatric surgery in low-, and middle-income countries. *Semin Pediatr Surg*. 2016 Feb 1;25(1):10–4.
  7. Jenkins KJ, Castañeda AR, Cherian KM, et al. Reducing mortality and infections after congenital heart surgery in the developing world. *Pediatrics*. 2014 Nov;134(5):e1422-1430.
  8. World Bank Data.
  9. Jenkins KJ. Risk adjustment for congenital heart surgery: the RACHS-1 method. *Semin Thorac Cardiovasc Surg Pediatr Card Surg Annu*. 2004;7:180–4.
  10. Jenkins KJ, Gauvreau K, Newburger JW, et al. Consensus-based method for risk adjustment for surgery for congenital heart disease. *J Thorac Cardiovasc Surg*. 2002 Jan 1;123(1):110–8.
  11. Harris PA, Taylor R, Thielke R, et al. Research electronic data capture (REDCap)—A metadata-driven methodology and workflow process for providing translational research informatics support. *J Biomed Inform*. 2009 Apr 1;42(2):377–81.
  12. Acerra JR, Iskyan K, Qureshi ZA, et al. Rebuilding the health care system in Afghanistan: an overview of primary care and emergency services. *Int J Emerg Med*. 2009 Jun 1;2(2):77–82.
  13. Joshi M. Comprehensive peace agreement implementation and reduction in neonatal, infant and under-5 mortality rates in post-armed conflict states, 1989–2012. *BMC Int Health Hum Rights*. 2015 Oct 8;15:27.
  14. Li H, Feng H, Wang J, et al. Relationships among gross domestic product per capita, government health expenditure per capita and infant mortality rate in China. *Biomed Res* [Internet]. 2017 [cited 2018 Jun 11];28(6). Available from: <http://www.alliedacademies.org/abstract/relationships-among-gross-domestic-product-per->

capita-government-health-expenditure-per-capita-and-infant-mortality-rate-in-china-6865.html

15. Argent AC, Balachandran R, Vaidyanathan B, et al. Management of undernutrition and failure to thrive in children with congenital heart disease in low- and middle-income countries. *Cardiol Young*. 2017 Dec;27(S6):S22–30.
16. Oyarzún I, Claveria C, Larios G, et al. Nutritional recovery after cardiac surgery in children with congenital heart disease. *Rev Chil Pediatr*. 2018 Feb;89(1):24–31.
17. Vaidyanathan B, Radhakrishnan R, Sarala DA, et al. What Determines Nutritional Recovery in Malnourished Children After Correction of Congenital Heart Defects? *Pediatrics*. 2009 Aug 1;124(2):e294–9.
18. Under-Five Mortality [Internet]. UNICEF DATA. [cited 2018 Jun 11]. Available from: [//data.unicef.org/topic/child-survival/under-five-mortality/](http://data.unicef.org/topic/child-survival/under-five-mortality/)
19. Saxton AT, Poenaru D, Ozgediz D, et al. Economic Analysis of Children’s Surgical Care in Low- and Middle-Income Countries: A Systematic Review and Analysis. *PLOS ONE*. 2016 Oct 28;11(10):e0165480.
20. Debas HT, Donkor P, Gawande A, et al. *Essential surgery*. Third edition. Washington, DC: World Bank; 2015. 421 p. (Disease control priorities).
21. Kruk ME, Gage AD, Arsenault C, et al. High-quality health systems in the Sustainable Development Goals era: time for a revolution. *Lancet Glob Health*. 2018 Nov 1;6(11):e1196–252.
22. Finding the Invisible Child: Childhood Heart Disease and the Global Health Agenda [Internet]. *Children’s HeartLink*; 2015 [cited 2018 Jan 25]. Available from: <https://childrensheartlink.org/wp-content/uploads/2017/06/The-Invisible-Child-Brief-2.pdf>
23. Luboga S, Macfarlane SB, Schreeb J von, et al. Increasing Access to Surgical Services in Sub-Saharan Africa: Priorities for National and International Agencies Recommended by the Bellagio Essential Surgery Group. *PLOS Med*. 2009 Dec 22;6(12):e1000200.
24. Xiang L, Su Z, Liu Y, et al. Effect of family socioeconomic status on the prognosis of complex congenital heart disease in children: an observational cohort study from China. *Lancet Child Adolesc Health*. 2018 Jun 1;2(6):430–9.
25. Daenen W, Lacour-Gayet F, Aberg T, et al. Optimal Structure of a Congenital Heart Surgery Department in Europe: by EACTS Congenital Heart Disease Committee1. *Eur J Cardiothorac Surg*. 2003 Sep 1;24(3):343–51.

### Figure Legends

Figure 1. This graph shows negative correlation of GDP per capita on the x-axis and SMR on the y-axis by country.

Figure 2. This graph shows negative correlation of Health Expenditure per capita on the x-axis and SMR on the y-axis by country.

Figure 3. This graph shows positive correlation of Poverty Ratio at \$5.50 a day on the x-axis and SMR on the y-axis by country.

Figure 4. This graph shows a negative correlation of Surgical Specialist Workforce on the x-axis and SMR on the y-axis by country.

Online Supplemental Figure 1. This bar graph shows the unadjusted (observed) mortality rate for congenital heart surgery on the left y-axis and the Standardized Mortality Ratio (SMR) calculated using the RACHS model on the right y-axis. The x-axis show each country from lowest to highest number of cases.

Online Supplemental Figure 2. This graph shows positive correlation of Prevalence of Undernourishment on the x-axis and SMR on the y-axis by country.

Online Supplemental Figure 3. This graph shows positive correlation of Under-5 Mortality Rate on the x-axis and SMR on the y-axis by country.

Online Supplemental Figure 4. This graph shows negative correlation of Life Expectancy on the x-axis and SMR on the y-axis by country.

Online Supplemental Figure 5. This graph shows negative correlation of Domestic General Government Health Expenditure (% of GDP) on the x-axis and SMR on the y-axis by country.

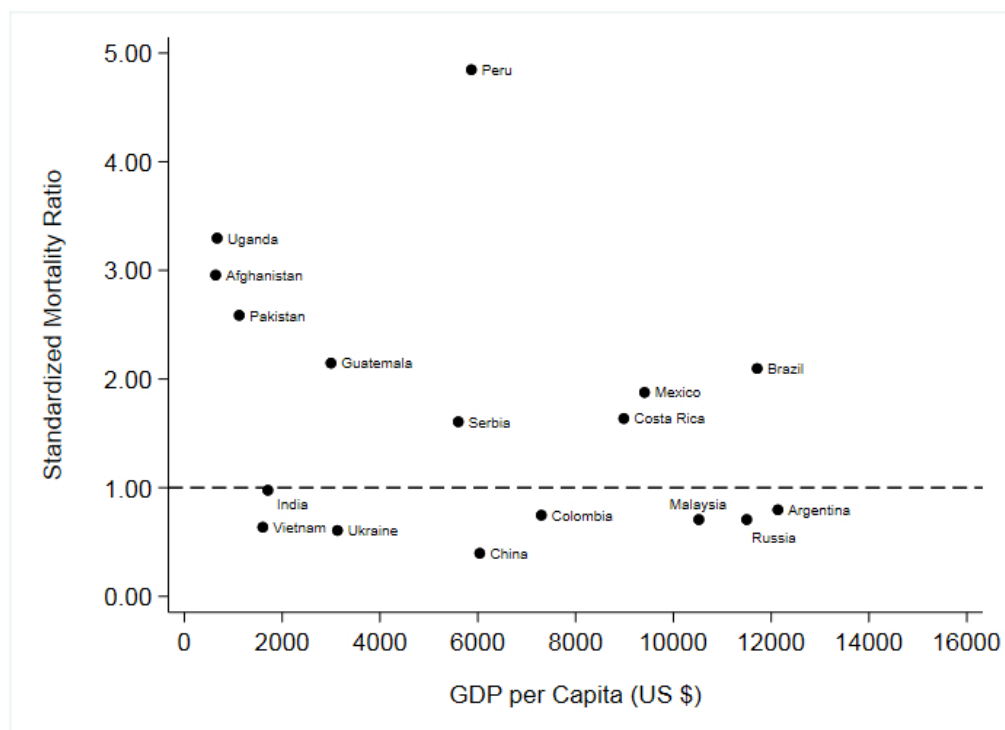

This graph shows negative correlation of GDP per capita on the x-axis and SMR on the y-axis by country.

1  
2  
3  
4  
5  
6  
7  
8  
9  
10  
11  
12  
13  
14  
15  
16  
17  
18  
19  
20  
21  
22  
23  
24  
25  
26  
27  
28  
29  
30  
31  
32  
33  
34  
35  
36  
37  
38  
39  
40  
41  
42  
43  
44  
45  
46  
47  
48  
49  
50  
51  
52  
53  
54  
55  
56  
57  
58  
59  
60

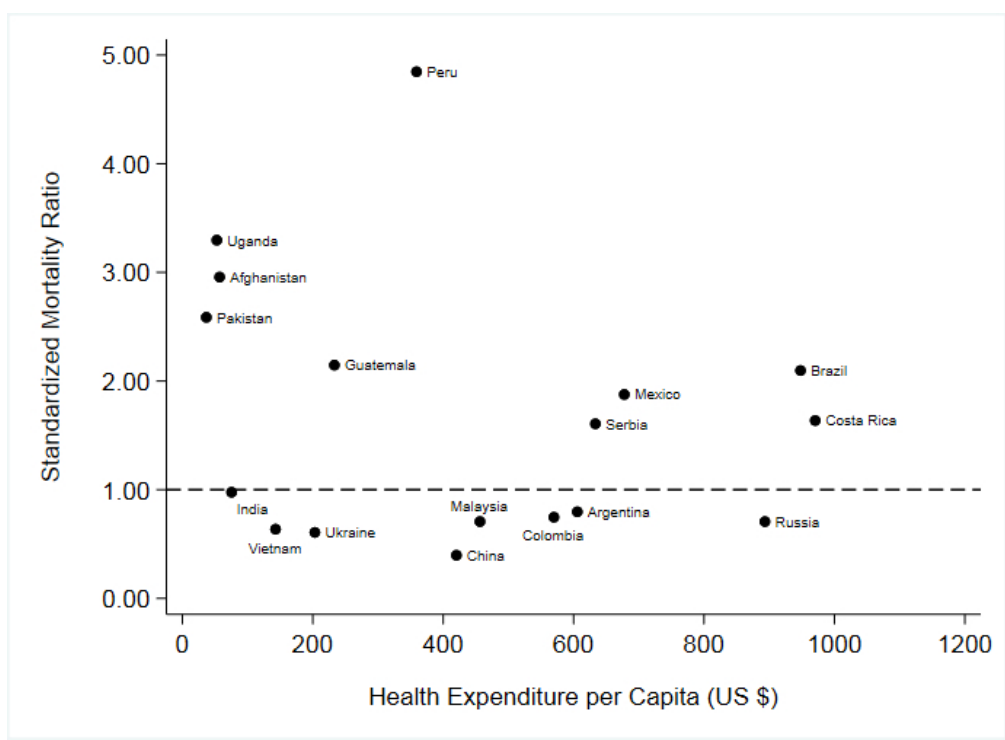

This graph shows negative correlation of Health Expenditure per capita on the x-axis and SMR on the y-axis by country.

1  
2  
3  
4  
5  
6  
7  
8  
9  
10  
11  
12  
13  
14  
15  
16  
17  
18  
19  
20  
21  
22  
23  
24  
25  
26  
27  
28  
29  
30  
31  
32  
33  
34  
35  
36  
37  
38  
39  
40  
41  
42  
43  
44  
45  
46  
47  
48  
49  
50  
51  
52  
53  
54  
55  
56  
57  
58  
59  
60

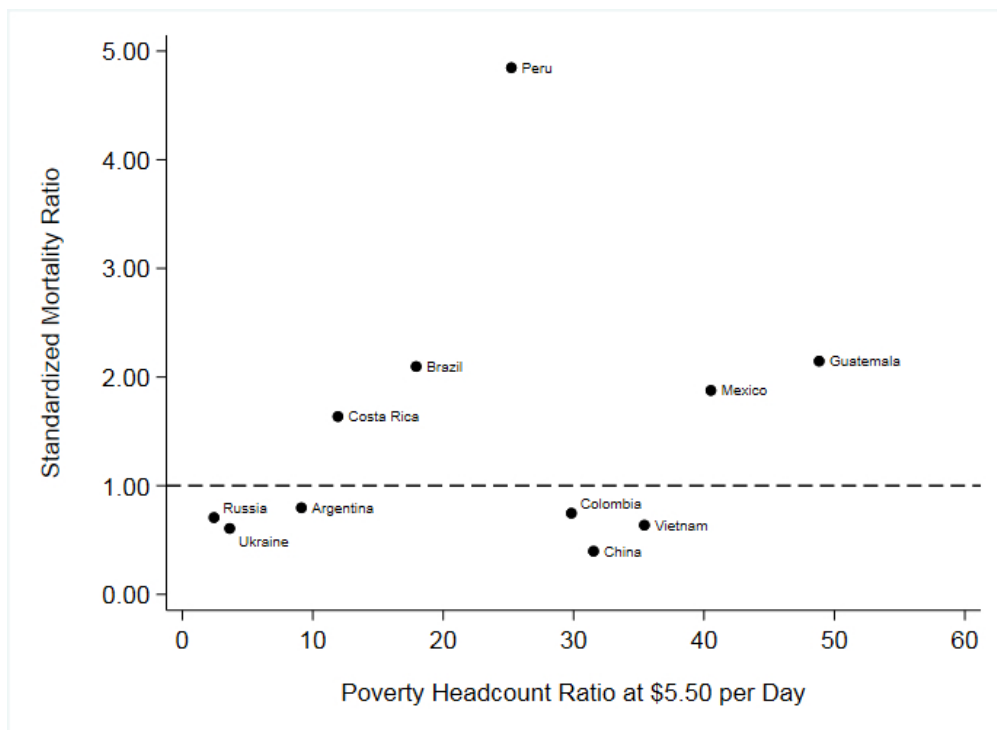

This graph shows positive correlation of Poverty Ratio at \$5.50 a day on the x-axis and SMR on the y-axis by country.

1  
2  
3  
4  
5  
6  
7  
8  
9  
10  
11  
12  
13  
14  
15  
16  
17  
18  
19  
20  
21  
22  
23  
24  
25  
26  
27  
28  
29  
30  
31  
32  
33  
34  
35  
36  
37  
38  
39  
40  
41  
42  
43  
44  
45  
46  
47  
48  
49  
50  
51  
52  
53  
54  
55  
56  
57  
58  
59  
60

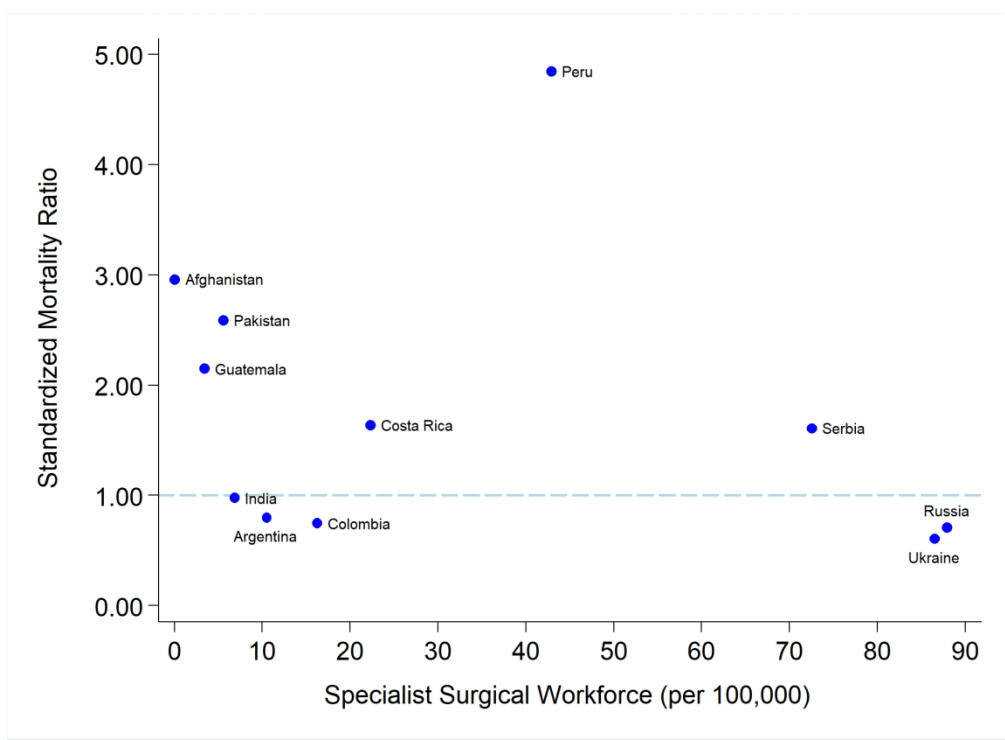

This graph shows a negative correlation of Surgical Specialist Workforce on the x-axis and SMR on the y-axis by country.

## Online Supplementary Figures and Tables

**Online Supplemental Table 1. Age Distribution of Congenital Heart Surgery Cases by Country**

| Country      | ≤30 days         | 31 days to <1 year | 1 to 17 years      |
|--------------|------------------|--------------------|--------------------|
| Afghanistan  | 0 (0%)           | 39 (9%)            | 393 (91%)          |
| Argentina    | 229 (13%)        | 615 (34%)          | 950 (53%)          |
| Brazil       | 147 (10%)        | 587 (42%)          | 671 (48%)          |
| China        | 164 (2%)         | 4335 (52%)         | 3832 (46%)         |
| Colombia     | 169 (10%)        | 657 (40%)          | 835 (50%)          |
| Costa Rica   | 27 (16%)         | 59 (35%)           | 81 (49%)           |
| Guatemala    | 20 (3%)          | 282 (38%)          | 431 (59%)          |
| India        | 345 (8%)         | 1942 (48%)         | 1780 (44%)         |
| Malaysia     | 55 (4%)          | 404 (31%)          | 843 (65%)          |
| Mexico       | 63 (12%)         | 139 (26%)          | 334 (62%)          |
| Pakistan     | 38 (2%)          | 602 (26%)          | 1706 (73%)         |
| Peru         | 5 (10%)          | 16 (33%)           | 27 (56%)           |
| Russia       | 38 (11%)         | 187 (54%)          | 123 (35%)          |
| Serbia       | 81 (27%)         | 125 (41%)          | 99 (32%)           |
| Uganda       | 1 (<1%)          | 53 (24%)           | 165 (75%)          |
| Ukraine      | 30 (11%)         | 104 (38%)          | 139 (51%)          |
| Vietnam      | 50 (5%)          | 525 (55%)          | 375 (39%)          |
|              |                  |                    |                    |
| <b>Total</b> | <b>1462 (6%)</b> | <b>10671 (43%)</b> | <b>12784 (51%)</b> |

**Online Supplemental Table 2. RACHS Category by Country**

| Country | RACHS Risk Category |  |  |  |  |
|---------|---------------------|--|--|--|--|
|         |                     |  |  |  |  |



|              | 1                 | 2                  | 3                 | 4                | 5+6             |
|--------------|-------------------|--------------------|-------------------|------------------|-----------------|
| Afghanistan  | 229 (53%)         | 175 (41%)          | 27 (6%)           | 1 (<1%)          | 0 (0%)          |
| Argentina    | 282 (16%)         | 682 (38%)          | 617 (34%)         | 162 (9%)         | 51 (3%)         |
| Brazil       | 277 (20%)         | 440 (31%)          | 536 (38%)         | 127 (9%)         | 25 (2%)         |
| China        | 859 (10%)         | 4935 (59%)         | 2192 (26%)        | 341 (4%)         | 4 (<1%)         |
| Colombia     | 553 (33%)         | 573 (35%)          | 415 (25%)         | 97 (6%)          | 23 (1%)         |
| Costa Rica   | 46 (28%)          | 74 (44%)           | 34 (20%)          | 12 (7%)          | 1 (1%)          |
| Guatemala    | 411 (56%)         | 236 (32%)          | 66 (9%)           | 18 (2%)          | 2 (<1%)         |
| India        | 548 (13%)         | 2009 (49%)         | 1066 (26%)        | 420 (10%)        | 24 (1%)         |
| Malaysia     | 108 (8%)          | 684 (53%)          | 336 (26%)         | 165 (13%)        | 9 (1%)          |
| Mexico       | 129 (24%)         | 202 (38%)          | 129 (24%)         | 66 (12%)         | 10 (2%)         |
| Pakistan     | 357 (15%)         | 1482 (63%)         | 444 (19%)         | 63 (3%)          | 0 (0%)          |
| Peru         | 10 (21%)          | 21 (44%)           | 14 (29%)          | 3 (6%)           | 0 (0%)          |
| Russia       | 122 (35%)         | 105 (30%)          | 98 (28%)          | 22 (6%)          | 1 (<1%)         |
| Serbia       | 52 (17%)          | 139 (46%)          | 79 (26%)          | 22 (7%)          | 13 (4%)         |
| Uganda       | 119 (54%)         | 95 (43%)           | 5 (2%)            | 0 (0%)           | 0 (0%)          |
| Ukraine      | 130 (48%)         | 69 (25%)           | 57 (21%)          | 17 (6%)          | 0 (0%)          |
| Vietnam      | 123 (13%)         | 594 (63%)          | 151 (16%)         | 81 (9%)          | 1 (<1%)         |
| <b>Total</b> | <b>4355 (17%)</b> | <b>12515 (50%)</b> | <b>6266 (25%)</b> | <b>1617 (6%)</b> | <b>164 (1%)</b> |

### Online Supplementary Table 3. Full RACHS Model

#### Cases Eligible for RACHS and Assigned to a Risk Category

|                                             | Odds Ratio | 95% Confidence Interval | P Value |
|---------------------------------------------|------------|-------------------------|---------|
| <b>RACHS Risk Category</b>                  |            |                         |         |
| 1                                           | 1.0        | -                       | -       |
| 2                                           | 2.3        | (1.7, 3.2)              | <0.001  |
| 3                                           | 6.7        | (5.0, 9.1)              | <0.001  |
| 4                                           | 9.5        | (6.8, 13.1)             | <0.001  |
| 5 + 6                                       | 43.6       | (28.2, 67.6)            | <0.001  |
| <b>Age at Surgery</b>                       |            |                         |         |
| ≤30 days                                    | 3.2        | (2.6, 3.9)              | <0.001  |
| 31 days to <1 year                          | 1.6        | (1.4, 1.8)              | <0.001  |
| 1 to 17 years                               | 1.0        | -                       | -       |
| <b>Prematurity</b>                          |            |                         |         |
|                                             | 1.4        | (1.1, 1.7)              | 0.007   |
| <b>Major Non-Cardiac Structural Anomaly</b> |            |                         |         |
|                                             | 2.0        | (1.5, 2.6)              | <0.001  |
| <b>Multiple Cardiac Procedures</b>          |            |                         |         |
|                                             | 1.0        | (0.9, 1.2)              | 0.80    |

C statistic for this model is 0.75.

#### Online Supplemental Table 4. Development Indicators and Standardized Mortality Ratio Correlations

##### Stratified by RACHS Category

##### Correlations with SMR

|                        | All Cases            | RACHS 1-2            | RACHS 3-6            |
|------------------------|----------------------|----------------------|----------------------|
|                        | Spearman r (p value) | Spearman r (p value) | Spearman r (p value) |
| GDP per capita (US \$) | -0.34 (0.18)         | -0.38 (0.14)         | -0.07 (0.81)         |

|                                                           |              |              |                 |
|-----------------------------------------------------------|--------------|--------------|-----------------|
| GNI per capita (US \$)                                    | -0.38 (0.13) | -0.40 (0.11) | -0.16 (0.58)    |
| Health expenditure per capita (US \$)                     | -0.23 (0.37) | -0.23 (0.38) | 0.13 (0.66)     |
| Undernourishment (%)                                      | 0.39 (0.17)  | 0.40 (0.15)  | 0.11 (0.74)     |
| Life expectancy at birth (years)                          | -0.35 (0.16) | -0.38 (0.14) | -0.07 (0.82)    |
| Under 5 mortality rate (per 1000)                         | 0.60 (0.01)  | 0.54 (0.02)  | 0.43 (0.12)     |
| Poverty headcount (%) V1                                  | 0.50 (0.12)  | 0.48 (0.13)  | 0.41 (0.24)     |
| Poverty headcount ratio (%) V2                            | 0.26 (0.43)  | 0.15 (0.65)  | 0.38 (0.28)     |
| Domestic general government health expenditure (% of GDP) | -0.22 (0.40) | -0.19 (0.47) | -0.01 (0.97)    |
| Specialist surgical workforce (per 100,000)               | -0.56 (0.07) | -0.50 (0.12) | -0.70 (0.04)    |
| Number of Countries                                       | 17           | 17           | 14 <sup>#</sup> |

# 3 countries (Afghanistan, Peru, and Uganda) were not used in the RACHS 3-6 correlations due to small number of cases.

**Online Supplemental Figure 1. Congenital Heart Surgery Unadjusted Mortality Rate and Standardized Mortality Ratio by Country**

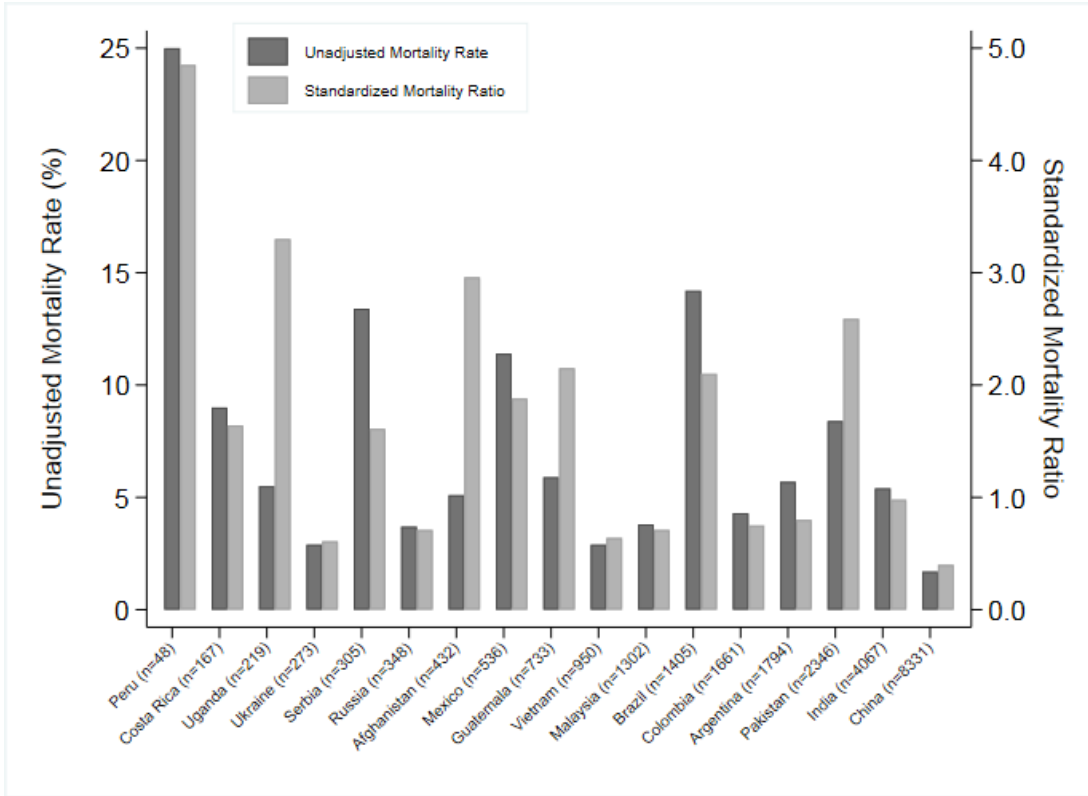

Online Supplemental Figure 2. Undernourishment and SMR

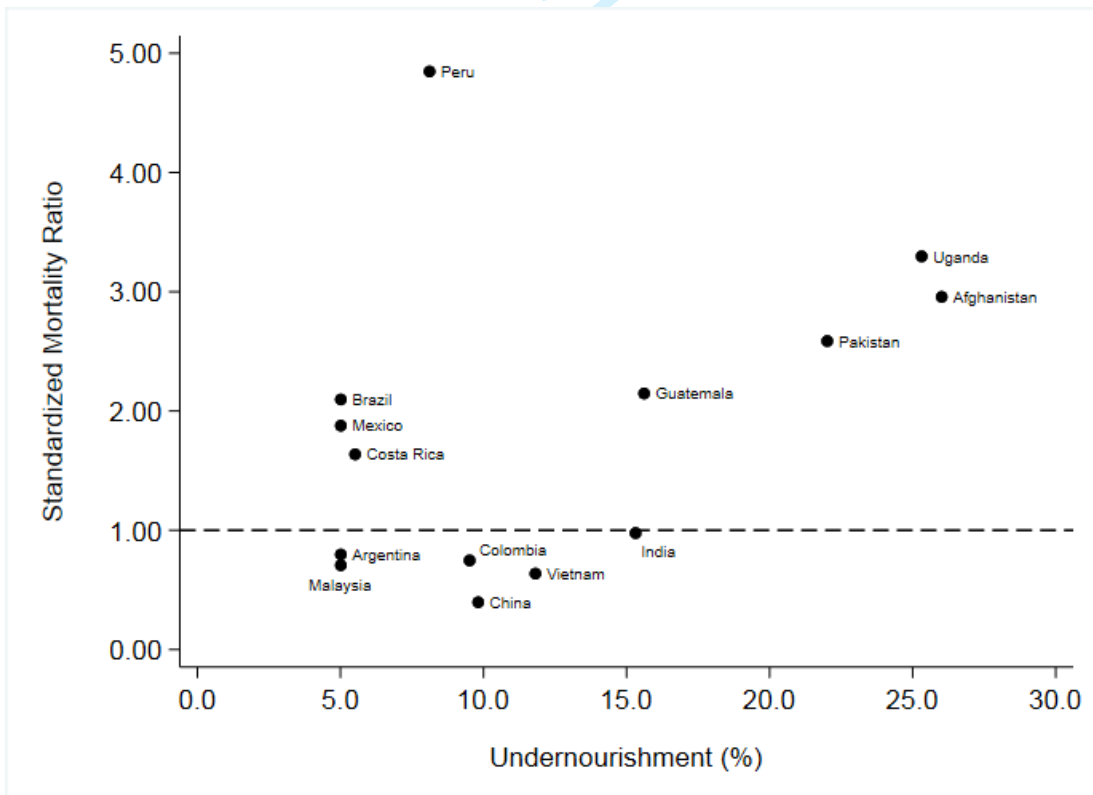

1  
2  
3  
4  
5  
6  
7  
8  
9  
10  
11  
12  
13  
14  
15  
16  
17  
18  
19  
20  
21  
22  
23  
24  
25  
26  
27  
28  
29  
30  
31  
32  
33  
34  
35  
36  
37  
38  
39  
40  
41  
42  
43  
44  
45  
46  
47  
48  
49  
50  
51  
52  
53  
54  
55  
56  
57  
58  
59  
60

**Online Supplemental Figure 3. Under-5 Mortality Rate and SMR**

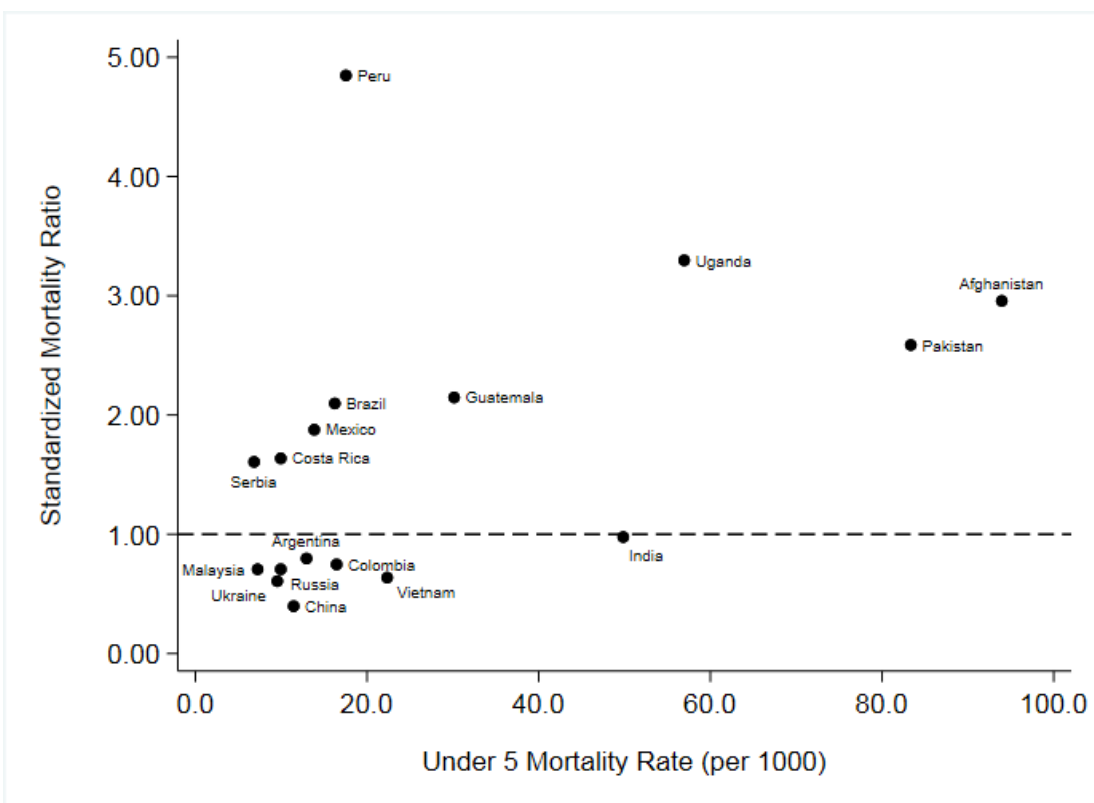

**Online Supplemental Figure 4. Life Expectancy and SMR**

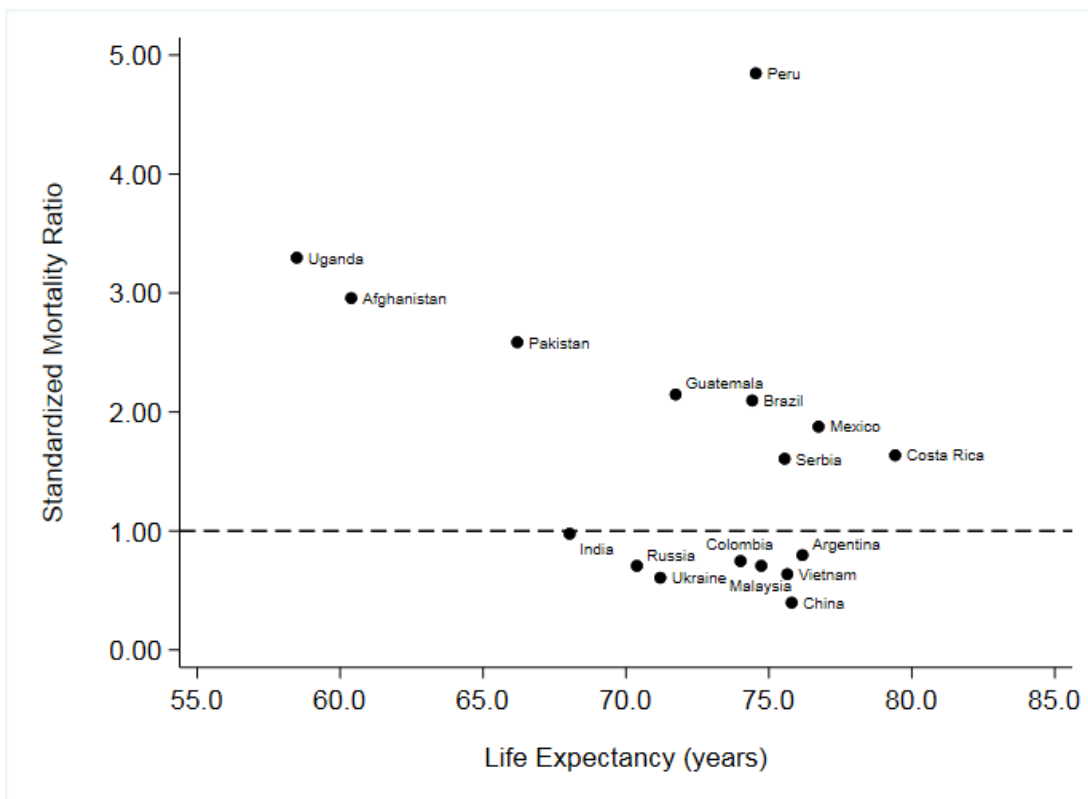

Online Supplemental Figure 5. Domestic General Government Health Expenditure and SMR

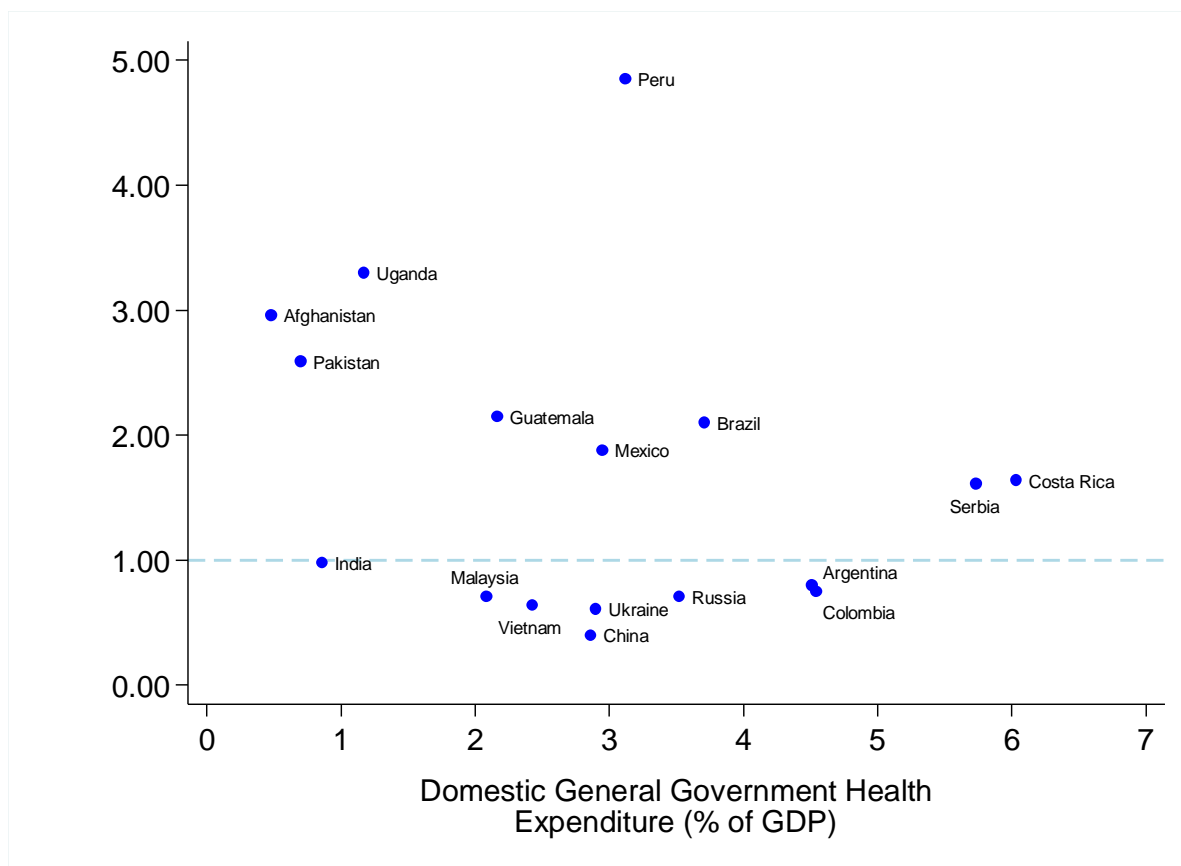

### Online Supplemental Figure Legends

Online Supplemental Figure 1. This bar graph shows the unadjusted (observed) mortality rate for congenital heart surgery on the left y-axis and the Standardized Mortality Ratio (SMR) calculated using the RACHS model on the right y-axis. The x-axis show each country from lowest to highest number of cases.

Online Supplemental Figure 2. This graph shows positive correlation of Prevalence of Undernourishment on the x-axis and SMR on the y-axis by country.

Online Supplemental Figure 3. This graph shows positive correlation of Under-5 Mortality Rate on the x-axis and SMR on the y-axis by country.

Online Supplemental Figure 4. This graph shows negative correlation of Life Expectancy on the x-axis and SMR on the y-axis by country.

Online Supplemental Figure 5. This graph shows negative correlation of Domestic General Government Health Expenditure (% of GDP) on the x-axis and SMR on the y-axis by country.

**STROBE 2007 (v4) Statement—Checklist of items that should be included in reports of *cross-sectional studies***

| Section/Topic                | Item # | Recommendation                                                                                                                                                                       | Reported on page # |
|------------------------------|--------|--------------------------------------------------------------------------------------------------------------------------------------------------------------------------------------|--------------------|
| <b>Title and abstract</b>    | 1      | (a) Indicate the study's design with a commonly used term in the title or the abstract                                                                                               | 2                  |
|                              |        | (b) Provide in the abstract an informative and balanced summary of what was done and what was found                                                                                  | 2                  |
| <b>Introduction</b>          |        |                                                                                                                                                                                      |                    |
| Background/rationale         | 2      | Explain the scientific background and rationale for the investigation being reported                                                                                                 | 3                  |
| Objectives                   | 3      | State specific objectives, including any prespecified hypotheses                                                                                                                     | 3-4                |
| <b>Methods</b>               |        |                                                                                                                                                                                      |                    |
| Study design                 | 4      | Present key elements of study design early in the paper                                                                                                                              | 4                  |
| Setting                      | 5      | Describe the setting, locations, and relevant dates, including periods of recruitment, exposure, follow-up, and data collection                                                      | 5                  |
| Participants                 | 6      | (a) Give the eligibility criteria, and the sources and methods of selection of participants                                                                                          | 5                  |
| Variables                    | 7      | Clearly define all outcomes, exposures, predictors, potential confounders, and effect modifiers. Give diagnostic criteria, if applicable                                             | 5                  |
| Data sources/<br>measurement | 8*     | For each variable of interest, give sources of data and details of methods of assessment (measurement). Describe comparability of assessment methods if there is more than one group | 5                  |
| Bias                         | 9      | Describe any efforts to address potential sources of bias                                                                                                                            | 5                  |
| Study size                   | 10     | Explain how the study size was arrived at                                                                                                                                            | 5                  |
| Quantitative variables       | 11     | Explain how quantitative variables were handled in the analyses. If applicable, describe which groupings were chosen and why                                                         | 6                  |
| Statistical methods          | 12     | (a) Describe all statistical methods, including those used to control for confounding                                                                                                | 6-7                |
|                              |        | (b) Describe any methods used to examine subgroups and interactions                                                                                                                  | 6-7                |
|                              |        | (c) Explain how missing data were addressed                                                                                                                                          | Table 1            |
|                              |        | (d) If applicable, describe analytical methods taking account of sampling strategy                                                                                                   | n/a                |
|                              |        | (e) Describe any sensitivity analyses                                                                                                                                                | n/a                |
| <b>Results</b>               |        |                                                                                                                                                                                      |                    |



|                          |     |                                                                                                                                                                                                              |         |
|--------------------------|-----|--------------------------------------------------------------------------------------------------------------------------------------------------------------------------------------------------------------|---------|
| Participants             | 13* | (a) Report numbers of individuals at each stage of study—eg numbers potentially eligible, examined for eligibility, confirmed eligible, included in the study, completing follow-up, and analysed            | n/a     |
|                          |     | (b) Give reasons for non-participation at each stage                                                                                                                                                         | 5       |
|                          |     | (c) Consider use of a flow diagram                                                                                                                                                                           | n/a     |
| Descriptive data         | 14* | (a) Give characteristics of study participants (eg demographic, clinical, social) and information on exposures and potential confounders                                                                     | 5       |
|                          |     | (b) Indicate number of participants with missing data for each variable of interest                                                                                                                          | Table 1 |
| Outcome data             | 15* | Report numbers of outcome events or summary measures                                                                                                                                                         | 8       |
| Main results             | 16  | (a) Give unadjusted estimates and, if applicable, confounder-adjusted estimates and their precision (eg, 95% confidence interval). Make clear which confounders were adjusted for and why they were included | 8       |
|                          |     | (b) Report category boundaries when continuous variables were categorized                                                                                                                                    | 8       |
|                          |     | (c) If relevant, consider translating estimates of relative risk into absolute risk for a meaningful time period                                                                                             | n/a     |
| Other analyses           | 17  | Report other analyses done—eg analyses of subgroups and interactions, and sensitivity analyses                                                                                                               | 9       |
| <b>Discussion</b>        |     |                                                                                                                                                                                                              |         |
| Key results              | 18  | Summarise key results with reference to study objectives                                                                                                                                                     | 9-10    |
| Limitations              | 19  | Discuss limitations of the study, taking into account sources of potential bias or imprecision. Discuss both direction and magnitude of any potential bias                                                   | 12      |
| Interpretation           | 20  | Give a cautious overall interpretation of results considering objectives, limitations, multiplicity of analyses, results from similar studies, and other relevant evidence                                   | 13      |
| Generalisability         | 21  | Discuss the generalisability (external validity) of the study results                                                                                                                                        | 12-13   |
| <b>Other information</b> |     |                                                                                                                                                                                                              |         |
| Funding                  | 22  | Give the source of funding and the role of the funders for the present study and, if applicable, for the original study on which the present article is based                                                | 14      |

\*Give information separately for cases and controls in case-control studies and, if applicable, for exposed and unexposed groups in cohort and cross-sectional studies.

**Note:** An Explanation and Elaboration article discusses each checklist item and gives methodological background and published examples of transparent reporting. The STROBE checklist is best used in conjunction with this article (freely available on the Web sites of PLoS Medicine at <http://www.plosmedicine.org/>, Annals of Internal Medicine at <http://www.annals.org/>, and Epidemiology at <http://www.epidem.com/>). Information on the STROBE Initiative is available at [www.strobe-statement.org](http://www.strobe-statement.org).

# BMJ Open

## Linking World Bank Development Indicators and Outcomes of Congenital Heart Surgery in Low- and Middle-Income Countries: a Retrospective Analysis of Quality Improvement Data

|                                 |                                                                                                                                                                                                                                                                                                                                                                                                                                                                                                                                                                                                                                                                                                                                                                                                                                                                                                                                      |
|---------------------------------|--------------------------------------------------------------------------------------------------------------------------------------------------------------------------------------------------------------------------------------------------------------------------------------------------------------------------------------------------------------------------------------------------------------------------------------------------------------------------------------------------------------------------------------------------------------------------------------------------------------------------------------------------------------------------------------------------------------------------------------------------------------------------------------------------------------------------------------------------------------------------------------------------------------------------------------|
| Journal:                        | <i>BMJ Open</i>                                                                                                                                                                                                                                                                                                                                                                                                                                                                                                                                                                                                                                                                                                                                                                                                                                                                                                                      |
| Manuscript ID                   | bmjopen-2018-028307.R1                                                                                                                                                                                                                                                                                                                                                                                                                                                                                                                                                                                                                                                                                                                                                                                                                                                                                                               |
| Article Type:                   | Research                                                                                                                                                                                                                                                                                                                                                                                                                                                                                                                                                                                                                                                                                                                                                                                                                                                                                                                             |
| Date Submitted by the Author:   | 05-Feb-2019                                                                                                                                                                                                                                                                                                                                                                                                                                                                                                                                                                                                                                                                                                                                                                                                                                                                                                                          |
| Complete List of Authors:       | Rahman, Sarah; Harvard College<br>Zheleva, Bistra; Children's HeartLink<br>Cherian, K.M.; Frontier Lifeline Hospital and Dr. KM Cherian Foundation<br>Christenson, Jan; University Hospital of Geneva, Secretary General<br>Global Forum on Humanitarian Medicine in Cardiology and Cardiac Surgery (GFHM)<br>Doherty, Kaitlin; Children's Hospital Boston<br>de Ferranti, David; Results for Development Institute<br>Gauvreau, Kimberlee; Children's Hospital Boston<br>Hickey, Patricia; Children's Hospital Boston<br>Kumar, Raman; Amrita Institute of Medical Sciences and Research Centre<br>Kupiec, Jennifer; Children's Hospital Boston<br>Novick, William; University of Tennessee Health Science Center-Global Surgery Institute and William Novick Global Cardiac Alliance<br>Sandoval, Nestor; Fundacion Cardioinfantil-Instituto de Cardiologia, Universidad del Rosario<br>Jenkins, Kathy; Children's Hospital Boston |
| <b>Primary Subject Heading</b>: | Global health                                                                                                                                                                                                                                                                                                                                                                                                                                                                                                                                                                                                                                                                                                                                                                                                                                                                                                                        |
| Secondary Subject Heading:      | Health policy, Surgery, Paediatrics, Cardiovascular medicine                                                                                                                                                                                                                                                                                                                                                                                                                                                                                                                                                                                                                                                                                                                                                                                                                                                                         |
| Keywords:                       | PAEDIATRICS, SURGERY, Congenital heart disease < CARDIOLOGY, Paediatric cardiology < CARDIOLOGY                                                                                                                                                                                                                                                                                                                                                                                                                                                                                                                                                                                                                                                                                                                                                                                                                                      |
|                                 |                                                                                                                                                                                                                                                                                                                                                                                                                                                                                                                                                                                                                                                                                                                                                                                                                                                                                                                                      |

SCHOLARONE™  
Manuscripts

## Linking World Bank Development Indicators and Outcomes of Congenital Heart Surgery in Low- and Middle-Income Countries: a Retrospective Analysis of Quality Improvement Data

Sarah Rahman, AB,<sup>a</sup> Bistra Zheleva, MBA,<sup>i</sup> K.M. Cherian MD,<sup>b</sup> Jan T. Christenson, MD,<sup>c</sup> Kaitlin Doherty BS,<sup>d</sup> David de Ferranti, PhD,<sup>e</sup> Kimberlee Gauvreau, ScD,<sup>d</sup> Patricia A. Hickey, PhD, Raman Krishan Kumar DM<sup>f</sup>, Jennifer Koch Kupiec, MPH<sup>d</sup>, William M. Novick, MD<sup>g</sup>, Nestor F. Sandoval, MD,<sup>h</sup> Kathy J. Jenkins MD<sup>d</sup>

- a. Harvard University, Cambridge, MA
- b. Frontier Lifeline Hospital and Dr. KM Cherian Foundation, Mogappair, Tamil Nadu, India
- c. University Hospital of Geneva, Secretary General Global Forum on Humanitarian Medicine in Cardiology and Cardiac Surgery (GFHM) Geneva, Switzerland
- d. Boston Children's Hospital, Boston, MA
- e. Results for Development, Washington, DC
- f. Amrita Institute of Medical Sciences, Kochi, India
- g. University of Tennessee Health Science Center-Global Surgery Institute and William Novick Global Cardiac Alliance, Memphis, TN
- h. Fundacion Cardioinfantil-Instituto de Cardiologia, Universidad del Rosario, Bogota, Colombia
- i. Children's HeartLink, Edina, MN

Correspondence to: Dr. Kathy Jenkins  
Boston Children's Hospital  
300 Longwood Avenue  
Boston, MA 02115  
[Kathy.Jenkins@cardio.chboston.org](mailto:Kathy.Jenkins@cardio.chboston.org)  
(617) 355-7275

Word Count: 3784

### Abstract

**Objective:** Many Low- and Middle-Income Countries (LMICs) struggle to provide the health services investment required for life-saving Congenital Heart Disease (CHD) surgery. We explored associations between risk-adjusted CHD surgical mortality from 17 LMICs and global development indices to identify patterns that might inform investment strategies.

**Design:** Retrospective analysis. Country-specific Standardized Mortality Ratios were graphed against global development indices reflective of wealth and healthcare investment. Spearman correlation coefficients were calculated.

**Setting and Participants:** The International Quality Improvement Collaborative (IQIC) keeps a volunteer registry of outcomes of CHD surgery programs in low resource settings. Inclusion in the IQIC is voluntary enrollment by hospital sites. Patients in the registry underwent congenital heart surgery. Sites that actively participated in IQIC in 2013, 2014, or 2015 and passed a 10%

1  
2  
3 data audit were asked for permission to share data for this study. 31 sites in 17 countries are  
4 included.  
5

6  
7 Outcome Measures: In-hospital mortality. Standardized Mortality Ratios were calculated. Risk-  
8 adjustment for in-hospital mortality uses the RACHS method, a model including surgical risk  
9 category, age group, prematurity, presence of a major non-cardiac structural anomaly, and  
10 multiple congenital heart procedures during admission.  
11

12 Results: The IQIC registry includes 24,917 congenital heart surgeries performed in children <18  
13 years of age. The overall in-hospital mortality rate was 5.0 %. Country-level congenital heart  
14 surgery Standardized Mortality Ratios were negatively correlated with Gross Domestic Product  
15 (GDP) per capita ( $r = -0.34$ ,  $p = 0.18$ ), and health expenditure per capita ( $r = -0.23$ ,  $p = 0.37$ ) and  
16 positively correlated with under-5 mortality ( $r = .60$ ,  $p = .01$ ) and undernourishment ( $r = 0.39$ ,  
17  $p = 0.17$ ). Countries with lower development had wider variation in mortality. GDP per capita is a  
18 driver of the association between some other measures and mortality.  
19  
20

21 Conclusions: Results display a moderate relationship between wealth, healthcare investment and  
22 malnutrition, with significant variation, including superior results in many countries with low  
23 GDP per capita. These findings provide context and optimism for investment in CHD procedures  
24 in low resource settings.  
25  
26

### 27 **Strengths and Limitations of This Study**

  
28  
29

- 30  
31 • This study uses data from the International Quality Improvement Collaborative for  
32 Congenital Heart Disease (IQIC), which offers a unique opportunity to study outcomes  
33 from LMICs where little is known about outcomes for congenital heart surgery.  
34  
35
- 36 • This is the first study to directly compare development and investment to congenital heart  
37 surgery outcomes.  
38  
39
- 40 • This study adds context to the discussion of national investment in tertiary care in general  
41 and for congenital heart surgery in specific emerging economies.  
42  
43
- 44 • Study sample size is limited by the number of participants in IQIC.  
45  
46
- 47 • The study does not examine regional variability within countries.  
48  
49  
50  
51  
52  
53

## 54 **INTRODUCTION**

  
55  
56  
57  
58  
59  
60

1  
2  
3 In 2015, more than 150 world leaders at the United Nations agreed to adopt the 17  
4 Sustainable Development Goals (SDGs) calling for a sustained investment globally to achieve a  
5 number of targets aiming at eradicating poverty and inequality, take action on climate change  
6 and the environment, improve access to health and education, and build strong institutions and  
7 partnerships.(1) Of particular importance is SDG3, ensure healthy lives and promote well-being  
8 for all at all ages and its demanding target to reduce neonatal mortality to at least as low as 12  
9 per 1,000 live births and under-5 mortality to at least as low as 25 per 1,000 live births by 2030.  
10 Recent studies show that congenital anomalies, of which heart disease represents nearly half, are  
11 the fourth leading cause of neonatal deaths, especially for countries with lower overall childhood  
12 mortality,(2) which tend to be middle-, upper-middle- and high-income countries. Congenital  
13 Heart Disease (CHD) can also be a significant contributor to poverty as families can incur  
14 catastrophic health costs if care is not covered by health insurance.  
15  
16  
17  
18  
19  
20  
21  
22  
23  
24  
25  
26  
27  
28  
29  
30

31 Surgery for congenital heart disease requires substantial resources, and a highly specialized  
32 healthcare infrastructure. LMICs lack both access to care and capacity to perform congenital  
33 heart surgeries safely and effectively. Less developed countries have disproportionately higher  
34 amount of congenital heart disease per million Gross Domestic Product (GDP) compared to  
35 more economically developed countries.(3) In some cases, even countries that fall in the high-  
36 income group, or higher income regions within a country, struggle with allocating appropriate  
37 resources to CHD services. For example, Argentina is typically classified as high-income, but  
38 centers from Argentina chose to be in the International Quality Improvement Collaborative  
39 because they felt they struggled with similar problems as LMICs for congenital heart surgery.  
40  
41  
42  
43  
44  
45  
46  
47  
48  
49  
50

51 Literature has examined general surgical mortality in LMICs, but to date, no studies have  
52 examined congenital heart surgery mortality in a comparative context to development. Lebrun et  
53  
54  
55  
56  
57  
58  
59  
60

1  
2  
3 al. surveyed hospitals in multiple low income countries and found limited operative capacity for  
4 surgery with most countries having less than one surgeon or anesthesiologist per 100,000  
5 population.(4) Bainbridge et al. found that in a mixed surgical population, perioperative  
6 mortality declined from the 1970s to 2011, especially in developing countries.(5) Hsuing and  
7 Abdallah highlight the need for more data on funding of paediatric surgery in LMICs.(6)

8  
9  
10 An analysis of congenital heart surgery outcomes within LMICs adds context to the efforts of  
11 countries to reduce mortality for congenital heart disease. We retrospectively explored  
12 associations between risk-adjusted in-hospital survival after congenital heart surgery and  
13 indicators of national development and healthcare investment among centers in LMICs  
14 participating in an international quality improvement collaborative aimed at reducing congenital  
15 heart surgery mortality.

## 16 17 18 19 20 21 22 23 24 25 26 27 28 **METHODS**

### 29 30 31 **Congenital Heart Surgery Outcomes**

32  
33 The International Quality Improvement Collaborative for Congenital Heart Disease (IQIC)  
34 collects surgical outcome data from participating centers in low-resource-settings around the  
35 world. The IQIC aims to reduce mortality for congenital heart surgery by collaborating with  
36 local sites to implement quality improvement strategies such as perioperative communication,  
37 infection reduction, and team-based practice.(7) The IQIC began collecting data in 2008 from  
38 five sites and has since grown to 64 sites across 25 countries in 2018. The database is housed at  
39 Boston Children's Hospital.

40  
41  
42 Outcome data (in-hospital mortality) in the IQIC registry was collected by individual  
43 programs on paediatric congenital heart surgeries performed at each site. Inclusion in the IQIC is  
44 voluntary enrollment by hospital sites. Patients included in the registry underwent congenital  
45  
46  
47  
48  
49  
50  
51  
52  
53  
54  
55  
56  
57  
58  
59  
60

1  
2  
3 heart surgery. Sites that actively participated in IQIC in 2013, 2014, or 2015 and successfully  
4 passed a 10% data audit were asked for permission to share data for this study. A total of 31  
5 sites in 17 countries (Afghanistan, Argentina, Brazil, China, Colombia, Costa Rica, Guatemala,  
6 India, Malaysia, Mexico, Pakistan, Peru, Russia, Serbia, Uganda, Ukraine, and Vietnam) chose  
7 to participate.  
8  
9  
10  
11  
12  
13  
14  
15

### 16 **Development Indicators**

17  
18  
19 The 2014 country-level development indicators are drawn from the publicly available World  
20 Bank World Development Indicators database.<sup>(8)</sup> Eight variables are included as indicators of  
21 country development and investment in health: Gross Domestic Product (GDP) per capita, health  
22 expenditure per capita, under-5 mortality rate, poverty headcount ratio at \$5.50 per day,  
23 prevalence of undernourishment, life expectancy at birth, domestic general government health  
24 expenditure (% of GDP), and specialist surgical workforce (per 100,000 population).  
25  
26  
27  
28  
29  
30  
31  
32

33 GDP per capita (in constant 2010 US\$) is the sum of gross value added by all resident  
34 producers (plus taxes, minus subsidies) divided by midyear population.<sup>(8)</sup> Health expenditure  
35 per capita (in current US\$) is the sum of public and private health expenditures as a ratio of total  
36 population.<sup>(8)</sup> Prevalence of undernourishment is the percentage of the population whose food  
37 intake is insufficient to meet dietary energy requirements continuously.<sup>(8)</sup> Poverty headcount  
38 ratio is internationally comparable measure of the percentage of the population with income less  
39 than \$5.50 a day (2011 international prices).<sup>(8)</sup> The under-5 mortality rate (per 1,000 live births)  
40 is the probability that a newborn baby will die before reaching age five, based on age-specific  
41 mortality rates of that year.<sup>(8)</sup> Life expectancy measures years of life for a newborn given  
42 current mortality patterns remain throughout their life.<sup>(8)</sup> Domestic general government health  
43  
44  
45  
46  
47  
48  
49  
50  
51  
52  
53  
54  
55  
56  
57  
58  
59  
60

1  
2  
3 expenditure is the amount of public expenses on health as a share of the economy (GDP). (8)

4  
5 Specialist surgical workforce is the number of specialist surgical, anesthetic, and obstetric  
6  
7  
8 providers (per 100,000 of population). (8)

### 9 10 **Data Analysis**

11  
12  
13 We completed a retrospective analysis of IQIC registry data. For each country, we used the  
14  
15 IQIC registry to determine the total number of cases of congenital heart surgery in the registry in  
16  
17 children less than 18 years of age over the three-year period 2013-2015. The observed in-  
18  
19 hospital mortality rate was calculated as the number of deaths occurring prior to hospital  
20  
21 discharge divided by the total number of RACHS-classified surgical cases. The Risk Adjustment  
22  
23 for Congenital Heart Surgery (RACHS) model is used to evaluate differences in mortality among  
24  
25 groups of patients undergoing congenital heart surgery.(9) The outcome measure used is a  
26  
27 Standardized Mortality Ratio (SMR) for each country, defined as the observed in-hospital  
28  
29 mortality rate divided by the mortality rate that would be expected given the country's patient  
30  
31 case mix. The expected in-hospital mortality rate was calculated using the previously validated  
32  
33 RACHS risk adjustment method (7,10). The model included surgical risk category (categories 1  
34  
35 through 6, where 1 represents surgical procedures with the lowest risk for in-hospital mortality  
36  
37 and 6 the highest), age group ( $\leq 30$  days, 31 days to  $< 1$  year, 1 to 17 years), prematurity ( $< 37$   
38  
39 weeks), presence of a major non-cardiac structural anomaly, and multiple congenital heart  
40  
41 procedures during the admission. The RACHS method was developed using U. S. outcomes  
42  
43 data, but since the inception of the IQIC in 2008 has been successfully applied to LMICs.(7) An  
44  
45 SMR greater than 1.0 suggests higher than expected mortality based on patient case mix, while  
46  
47 an SMR less than 1.0 represents lower than expected mortality. Two-way scatter plots were used  
48  
49 to examine the relationships between SMR and each development indicator; the strength of these  
50  
51  
52  
53  
54  
55  
56  
57  
58  
59  
60



relationships was quantified using Spearman correlation coefficients. We also used linear regression analysis to compare unadjusted regression coefficients relating each development indicator to SMR to coefficients adjusted for GDP per capita. We adjusted for GDP per capita because it is a common broad representation of economic status that has been linked to health. (11) We did not adjust for any other indicators. The natural log of SMR was used as the outcome for these models since SMR itself was not normally distributed. An ancillary analysis without Peru was also completed after it appeared to be an outlier in figures generated.

Furthermore, we completed a stratified analysis between low complexity cases (RACHS categories 1 and 2) and high complexity cases (RACHS categories 3-6) and SMR. To do this, for each country we calculated a SMR for RACHS 1-2 and a SMR for RACHS 3-6 and compared correlations between the low RACHS SMR and each development indicator with the high RACHS SMR and each development indicator.

### **Ethical Considerations**

The institutional review board at Boston Children's Hospital gave permission for the IQIC data registry to be used for this research. Study data were collected and managed using REDCap electronic data capture tools hosted at Boston Children's Hospital.(12) REDCap (Research Electronic Data Capture) is a secure, web-based application designed to support data capture for research studies, providing 1) an intuitive interface for validated data entry; 2) audit trails for tracking data manipulation and export procedures; 3) automated export procedures for seamless data downloads to common statistical packages; and 4) procedures for importing data from external sources. The senior author had complete access to the registry data, and the authors are responsible for the study design, analysis and interpretation of data, and the decision to submit the paper for publication.

### **Patient and Public Involvement Statement**

Patients and public were not involved in the development of this study.

## RESULTS

Among 31 programs in 17 countries, the IQIC database included 24,917 congenital heart surgeries performed in children <18 years of age. The number of programs per country ranged from one to six. The overall in-hospital mortality rate was 5.0 % and country-level mortality rate ranged from 1.7% to 25.0%. The number of congenital heart surgery cases by country and the proportion of cases in each country compared to the total cases is shown in online supplementary Figure 1. Centers in China represent the largest percentage of cases, with 33.4% of total cases. The age and RACHS category distribution of cases by country is shown in online supplementary Figures 2 and 3. In most countries, the majority of patients undergoing surgery in the centers are 1 to 17 years old. There is variation in the proportion of RACHS categories, but all countries have at least 50% of cases in low complexity RACHS category 1 or 2. The full RACHS model used to calculate country SMRs is shown in online supplementary Table 1.

Country SMRs range from 0.40 to 4.85. Unadjusted mortality rates and Standardized Mortality Rates by country are shown in online supplemental Figure 4. Correlation coefficients between each development index and SMR and regression coefficients, both unadjusted and adjusted by GDP per capita, by country are shown in Table 1.

**Table 1. Correlation and Regression Coefficients for Development Indicators with SMR**

| Indicator                     | Number of Countries | Correlation Coefficient | Unadjusted Regression Coefficient | Regression Coefficient adjusted for GDP per capita |
|-------------------------------|---------------------|-------------------------|-----------------------------------|----------------------------------------------------|
| GDP per capita                | 17                  | r=-0.34                 | -0.047                            | --                                                 |
| Health Expenditure per capita | 17                  | r= -0.23                | -0.035                            | 0.092                                              |
| Undernourishment              | 14 <sup>#</sup>     | r=0.39                  | 0.40                              | 0.78                                               |

|                                                |                 |          |         |         |
|------------------------------------------------|-----------------|----------|---------|---------|
| Under-5 Mortality Rate                         | 17              | r=.60*   | 0.13*   | 0.16    |
| Poverty Headcount Ratio at \$5.50 a day        | 11 <sup>#</sup> | r=0.26   | 0.12    | 0.19    |
| Life Expectancy                                | 17              | r= -0.35 | -0.50   | -0.49   |
| Domestic General Government Health Expenditure | 17              | r=-0.22  | -0.0937 | -0.0297 |
| Specialist Surgical Workforce                  | 11 <sup>#</sup> | r=-0.56  | -0.0737 | -0.0515 |

# World Bank index not available for some countries

\*significant at p<0.05

P-values: GDP correlation p=0.18, unadjusted regression coefficient p=.29, Health Expenditure correlation p=0.37, unadjusted regression p=0.55, adjusted regression p=0.47, Undernourishment correlation p=0.17, unadjusted regression p=0.14, adjusted regression p=0.20, Under-5 Mortality Rate correlation p=0.01, unadjusted regression p=0.04, adjusted regression p=0.08, Poverty Headcount ratio correlation p=0.43, unadjusted regression p=0.46, adjusted regression p=0.33, Life Expectancy correlation p=0.16, unadjusted regression p=0.11, adjusted regression p=0.24, Domestic General Government Health Expenditure correlation p=0.40, unadjusted regression p= 0.41 adjusted regression p=0.84 . Specialist Surgical Workforce p=0.07, unadjusted regression p=0.26, adjusted regression p=0.45.

The relationships between SMR by country and GDP per capita, health expenditure per capita, poverty headcount ratio, and specialist surgical workforce are shown in Figures 1-4 respectively. Notable in Figure 1 is a general trend towards lower SMR with increased GDP per capita, and Peru as a potential outlier in the data. Figure 2, health expenditure per capita, is similar to Figure 1; however, Serbia and Costa Rica seem to be at higher levels of health expenditure per capita than GDP per capita when compared with the other countries. The relationships between SMR and other development indicators (undernourishment, under-5

mortality rate, life expectancy, and domestic general government health expenditure) are shown in online supplemental figures 5-8.

Stratified analysis comparing congenital heart surgery mortality ratios from low complexity cases (low RACHS categories, 1-2) and high complexity cases (high RACHS categories, 3-6) are shown in Table 2. The low RACHS categories analysis includes a total of 16,870 cases, and the high RACHS categories analysis includes a total of 7,997 cases. The low RACHS score SMR correlation largely mirror the overall SMR Spearman correlation, while the high RACHS score SMR has a lower correlation than the low RACHS score SMR with each development indicator except poverty headcount ratio and specialist surgical workforce.

**Table 2. Development Indicators and Standardized Mortality Ratio Correlations Stratified by RACHS**

**Category**

*Correlations with SMR*

|                                       | All Cases            | RACHS 1-2            | RACHS 3-6            |
|---------------------------------------|----------------------|----------------------|----------------------|
|                                       | Spearman r (p value) | Spearman r (p value) | Spearman r (p value) |
| GDP per capita (US \$)                | -0.34 (0.18)         | -0.38 (0.14)         | -0.07 (0.81)         |
| GNI per capita (US \$)                | -0.38 (0.13)         | -0.40 (0.11)         | -0.16 (0.58)         |
| Health expenditure per capita (US \$) | -0.23 (0.37)         | -0.23 (0.38)         | 0.13 (0.66)          |
| Undernourishment (%)                  | 0.39 (0.17)          | 0.40 (0.15)          | 0.11 (0.74)          |
| Life expectancy at birth (years)      | -0.35 (0.16)         | -0.38 (0.14)         | -0.07 (0.82)         |
| Under 5 mortality rate (per 1000)     | 0.60 (0.01)          | 0.54 (0.02)          | 0.43 (0.12)          |

|                                                           |              |              |                 |
|-----------------------------------------------------------|--------------|--------------|-----------------|
| Poverty headcount (%) V1                                  | 0.50 (0.12)  | 0.48 (0.13)  | 0.41 (0.24)     |
| Poverty headcount ratio (%) V2                            | 0.26 (0.43)  | 0.15 (0.65)  | 0.38 (0.28)     |
| Domestic general government health expenditure (% of GDP) | -0.22 (0.40) | -0.19 (0.47) | -0.01 (0.97)    |
| Specialist surgical workforce (per 100,000)               | -0.56 (0.07) | -0.50 (0.12) | -0.70 (0.04)    |
| Number of Countries                                       | 17           | 17           | 14 <sup>#</sup> |

# 3 countries (Afghanistan, Peru, and Uganda) were not used in the RACHS 3-6 correlations due to small number of cases.

## DISCUSSION

We found the expected positive correlation between under-5 mortality and SMR, which was statistically significant. We also found a borderline statistically significant negative correlation between specialist surgical workforce and CHD mortality: as specialist surgical workforce increases, congenital heart surgery mortality decreases, suggesting that adequate workforce is integral to quality congenital heart surgical capacity. Other correlations found that are not statistically significant include negative associations of GDP per capita, Health Expenditure per capita, Domestic Government Health Expenditure, and Life Expectancy with congenital heart surgery SMR: as these indicators increase, SMR decreases. We found positive associations of Poverty Headcount and Undernourishment with SMR: as poverty headcount or undernourishment increases, SMR increases. The association of GDP per capita and SMR

1  
2  
3 suggests that overall development of a country may be an important component of surgical  
4 mortality.. While most associations do not reach statistical significance, they display links  
5  
6 between development and surgery outcomes.  
7  
8  
9

10 Although it is difficult to be conclusive, an interesting finding of this study is that there is still  
11 substantial variation between countries in SMRs even at similar development levels. For  
12 example, Afghanistan and Pakistan have much higher SMRs than India, although they are at  
13 similar GDP per capita levels. Nations with high levels of conflict such as Afghanistan may  
14 have stressed health systems as a whole,(13,14) which would impact congenital heart surgery  
15 services. Also, while Afghanistan, Pakistan, and India have similar GDP per capita levels, they  
16 have very different overall GDP levels, which may affect access to surgery for patients and  
17 impact congenital heart surgery SMR variation. Similarly, Peru, Serbia and China are at similar  
18 GDP per capita levels yet vary widely in mortality, with China at the lowest SMR. China has a  
19 well-organized and efficient health system that likely contributes to better outcomes. (15)  
20  
21 Although Peru appears to be an outlier, it is not influential – meaning it does not have a  
22 substantial impact on the correlation coefficients – with the exception of the association between  
23 SMR and undernourishment and SMR and specialist surgical workforce (both associations  
24 become stronger without Peru).  
25  
26  
27  
28  
29  
30  
31  
32  
33  
34  
35  
36  
37  
38  
39  
40  
41

42 When adjusting for GDP per capita, regression coefficients decrease in magnitude for some  
43 indicators—poverty, life expectancy, and under-5 mortality. Therefore, the data indicates that  
44 GDP per capita is a driver of the association between these specific indicators and congenital  
45 heart surgery mortality. However, the regression coefficient for undernourishment increases  
46 when controlling for GDP per capita, suggesting that population-wide undernourishment affects  
47 mortality after congenital heart surgery outside the effect of GDP. This may be reflective of the  
48  
49  
50  
51  
52  
53  
54  
55  
56  
57  
58  
59  
60

1  
2  
3 higher likelihood of children undergoing CHD surgery while malnourished in countries where  
4 malnourishment is more prevalent, and potentially higher risk of death in such  
5  
6 circumstances.(16–18) This also suggests that factors that correlate with general pediatric health,  
7  
8 such as undernourishment, impact surgical mortality, offering a target for further improvement of  
9  
10 health and surgical outcomes.  
11  
12  
13

14  
15 Comparative analysis of low RACHS SMRs with development indicators and high  
16  
17 RACHS SMRs with development indicators display that low RACHS SMRs correlations are  
18  
19 similar to the overall SMR correlations and thus may contribute more to the overall correlation  
20  
21 than high RACHS cases. Notably, high RACHS cases SMRs have a stronger correlation with  
22  
23 poverty headcount ratio and with specialist surgery workforce than low RACHS cases SMRs,  
24  
25 suggesting that low poverty and a present specialist surgery workforce are more important for  
26  
27 positive outcomes in high complexity cases. This potentially suggests that increasing training for  
28  
29 a specialist surgery workforce is necessary in LMICs.  
30  
31  
32

33  
34 As poverty and infectious diseases decrease, non-communicable diseases such as congenital  
35  
36 heart disease in LMICs account for a greater percentage of childhood deaths. Congenital defects  
37  
38 represented 8.7% of global under-5 mortality in 2016.(19) Many stakeholders believe congenital  
39  
40 heart surgery should be considered an “Essential Paediatric Surgical Procedure” due to the  
41  
42 economic value of these surgeries in a community.(20) A substantial fraction (58%) of  
43  
44 congenital heart defect burden (avertable disability years) could be alleviated with scaled up  
45  
46 congenital heart surgery programs in LMICs.(21) Quality in high-specialty care is of paramount  
47  
48 importance. A recent study estimated that cardiovascular diseases are the highest contributor to  
49  
50 amenable mortality due to poor-quality care.(22) Quality tertiary care requires trained personnel  
51  
52 and equipment and infection control.(23) Recommended strategies to improve surgical care  
53  
54  
55  
56  
57  
58  
59  
60

1  
2  
3 include training and basic infrastructure and equipment,(24) which necessitates investment in  
4  
5 healthcare systems.  
6

7  
8 Our method has several limitations. First, the sample size is only 17 countries and 31 sites  
9  
10 (for some indicators, fewer), which limits statistical power, and may be why most associations,  
11  
12 except under-5 mortality were not significant. Second, data are analyzed at the country-level but  
13  
14 using only facility-based clinical outcomes data from selected centers that participate in IQIC,  
15  
16 which are not representative of countrywide outcomes for CHD surgery and vary in the  
17  
18 proportion of country cases that they represent, making firm conclusions difficult, but suggesting  
19  
20 that country-specific analyses about patients at different poverty levels may be warranted. IQIC  
21  
22 sites are often tertiary level hospitals with large referral bases and academic intent towards  
23  
24 quality improvement; IQIC members are willing and able to collect data and participate in  
25  
26 quality improvement activities. That may mean that sometimes hospital settings represented in  
27  
28 this study do not always mirror the overall development level of their countries. However, most  
29  
30 high-income countries tend to regionalize CHD surgical centers in several large urban areas, to  
31  
32 avoid the creation of many small-volume centers. (25) Therefore, even though the overall quality  
33  
34 of care of the health systems may be low, the centers themselves may have quite good CHD  
35  
36 surgical outcomes. Country-level SMRs may also not accurately reflect regional variability in  
37  
38 level of development or resources available for congenital heart surgery, especially in large  
39  
40 countries such as China and India. For example, the sites in India are mostly from states in  
41  
42 Southern India, which tend to have higher development levels than the Northern part of the  
43  
44 country. There may also be variations in case mix of participating institutions due to gaps in the  
45  
46 existing diagnosis and referral networks, healthcare financing, and social and cultural factors that  
47  
48 may result in not treating the patients with the most severe disease, which may not be completely  
49  
50  
51  
52  
53  
54  
55  
56  
57  
58  
59  
60



1  
2  
3 accounted for in risk-adjustment models. Regional differences in healthcare financing for CHD  
4 surgery and in-hospital care, including public and private insurance, is a particularly important  
5 factor not examined in this study, since care becomes unaffordable to most families if is not  
6 included in universal health insurance coverage package. On the other hand, institutions too  
7 could potentially suffer financial losses if reimbursement for CHD surgery is not at the  
8 appropriate level.  
9

10  
11  
12 In conclusion, our results show correlations between various development indicators and  
13 congenital heart surgery mortality. Nonetheless, there is variation among countries of similar  
14 GDP per capita levels, and lower risk-adjusted mortality in some countries with lower  
15 development offers hope and encourages investment in congenital heart surgery programs. Our  
16 study can also be helpful for health policy decision-making. The recent global discourses on  
17 access to surgical services as well as on reduction of childhood mortality have been missing a  
18 macro analysis of the investments needed to develop surgical services in LMICs for high  
19 complexity diseases such as congenital heart disease. Our findings show that a link could be  
20 made between various development indicators and congenital heart surgery mortality, calling for  
21 more investigation at a regional level for quality and access improvement strategies and  
22 encouraging investment in congenital heart surgery programs and sub-specialty training,  
23 especially for all countries committed to achieving the SDG3 target of ending preventable deaths  
24 of newborns and children under 5 years of age. As governments consider development of  
25 different paediatric services, this study can give them guidance on areas they could invest in. The  
26 trend between economic factors and outcomes identified in this study can also be investigated by  
27 single centers using socioeconomic data of individual patients to see if a similar link arises,  
28 potentially helping to identify higher risk populations.  
29  
30  
31  
32  
33  
34  
35  
36  
37  
38  
39  
40  
41  
42  
43  
44  
45  
46  
47  
48  
49  
50  
51  
52  
53  
54  
55  
56  
57  
58  
59  
60

Further study is required to truly understand why countries with similar development levels vary in congenital heart surgery mortality. Future studies ought to investigate why such variations exist, and examine the role of governments, NGOs or other stakeholders, training and retention of skilled professionals and other personnel, and infection control practices in particular countries. Future studies should attempt to capture outcomes of children who did not have access to operations, as outcomes for these children are also likely associated with development and investment. Studies should also attempt to collect longer-term outcomes to represent the broader socioeconomic factors that may affect survival from CHD surgery (26) and that could be collected with a more population health focused database. This inquiry can help establish effective strategies for successful congenital heart surgical programs in LMICs.

### Abbreviations

|       |                                                                              |
|-------|------------------------------------------------------------------------------|
| CHD   | Congenital Heart Disease                                                     |
| GDP   | Gross Domestic Product                                                       |
| IQIC  | International Quality Improvement Collaborative for Congenital Heart Disease |
| LMICs | Low- and Middle-Income Countries                                             |
| NGO   | Non-Governmental Organization                                                |
| SDGs  | Sustainable Development Goals                                                |
| SMR   | Standardized Mortality Ratio                                                 |
| RACHS | Risk Adjustment for Congenital Heart Surgery                                 |

### Contributors

1  
2  
3 SR and KJ had the primary responsibility to design the study and write the manuscript. BZ, KMC, JTC,  
4 KD, KG, PAH, RKK, JKK, WN, NS, and KJ coordinated the global study data concept and collection.  
5 BZ revised multiple manuscript drafts, and DF interpreted data. KG conducted statistical analyses.  
6

### 7 **Declaration of Interests**

8 We declare no competing interests.  
9

### 10 **Acknowledgements**

11 This work has been published as a conference abstract at the American College of Cardiology  
12 and presented at The Global Forum on Humanitarian Medicine in Cardiology and Cardiac  
13 Surgery.  
14  
15

### 16 **Funding**

17 Funding was received from Kobren Family Chair for Patient Safety and Quality, Harvard  
18 University Summer Undergraduate Research in Global Health, and Harvard College Research  
19 Program.  
20  
21

### 22 **Data Sharing Statement**

23 Extra data is available by emailing the corresponding author.  
24  
25

### 26 **References**

- 27 1. Sustainable development goals - United Nations [Internet]. United Nations Sustainable  
28 Development. [cited 2018 May 21]. Available from:  
29 <https://www.un.org/sustainabledevelopment/sustainable-development-goals/>  
30
- 31 2. Liu L, Oza S, Hogan D, et al. Global, regional, and national causes of under-5 mortality in  
32 2000–15: an updated systematic analysis with implications for the Sustainable  
33 Development Goals. *The Lancet*. 2016;388(10063):3027–3035.  
34
- 35 3. A Case for the Invisible Child: Childhood Heart Disease and the Global Health Agenda  
36 [Internet]. Children’s HeartLink; 2015 [cited 2018 Jan 25]. Available from:  
37 <https://childrensheartlink.org/wp-content/uploads/2017/06/The-Invisible-Child-Brief-1.pdf>  
38  
39
- 40 4. LeBrun DG, Chackungal S, Chao TE, et al. Prioritizing essential surgery and safe  
41 anesthesia for the Post-2015 Development Agenda: Operative capacities of 78 district  
42 hospitals in 7 low- and middle-income countries. *Surgery*. 2014 Mar 1;155(3):365–73.  
43
- 44 5. Bainbridge D, Martin J, Arango M, Cheng D. Perioperative and anaesthetic-related  
45 mortality in developed and developing countries: a systematic review and meta-analysis.  
46 *The Lancet*. 2012 Sep 22;380(9847):1075–81.  
47  
48
- 49 6. Hsiung G, Abdullah F. Financing pediatric surgery in low-, and middle-income countries.  
50 *Semin Pediatr Surg*. 2016 Feb 1;25(1):10–4.  
51
- 52 7. Jenkins KJ, Castañeda AR, Cherian KM, et al. Reducing mortality and infections after  
53 congenital heart surgery in the developing world. *Pediatrics*. 2014 Nov;134(5):e1422-1430.  
54  
55
- 56 8. World Bank Data.  
57  
58  
59  
60

9. Jenkins KJ. Risk adjustment for congenital heart surgery: the RACHS-1 method. *Semin Thorac Cardiovasc Surg Pediatr Card Surg Annu.* 2004;7:180–4.
10. Jenkins KJ, Gauvreau K, Newburger JW, Spray TL, Moller JH, Iezzoni LI. Consensus-based method for risk adjustment for surgery for congenital heart disease. *J Thorac Cardiovasc Surg.* 2002 Jan 1;123(1):110–8.
11. Präg P, Mills MC, Wittek R. Subjective socioeconomic status and health in cross-national comparison. *Soc Sci Med.* 2016 Jan 1;149:84–92.
12. Harris PA, Taylor R, Thielke R, Payne J, Gonzalez N, Conde JG. Research electronic data capture (REDCap)—A metadata-driven methodology and workflow process for providing translational research informatics support. *J Biomed Inform.* 2009 Apr 1;42(2):377–81.
13. Acerra JR, Iskyan K, Qureshi ZA, Sharma RK. Rebuilding the health care system in Afghanistan: an overview of primary care and emergency services. *Int J Emerg Med.* 2009 Jun 1;2(2):77–82.
14. Joshi M. Comprehensive peace agreement implementation and reduction in neonatal, infant and under-5 mortality rates in post-armed conflict states, 1989–2012. *BMC Int Health Hum Rights.* 2015 Oct 8;15:27.
15. Li H, Feng H, Wang J, Qian Z, Gu J. Relationships among gross domestic product per capita, government health expenditure per capita and infant mortality rate in China. *Biomed Res [Internet].* 2017 [cited 2018 Jun 11];28(6). Available from: <http://www.alliedacademies.org/abstract/relationships-among-gross-domestic-product-per-capita-government-health-expenditure-per-capita-and-infant-mortality-rate-in-china-6865.html>
16. Argent AC, Balachandran R, Vaidyanathan B, Khan A, Kumar RK. Management of undernutrition and failure to thrive in children with congenital heart disease in low- and middle-income countries. *Cardiol Young.* 2017 Dec;27(S6):S22–30.
17. Oyarzún I, Claveria C, Larios G, Le Roy C. Nutritional recovery after cardiac surgery in children with congenital heart disease. *Rev Chil Pediatr.* 2018 Feb;89(1):24–31.
18. Vaidyanathan B, Radhakrishnan R, Sarala DA, Sundaram KR, Kumar RK. What Determines Nutritional Recovery in Malnourished Children After Correction of Congenital Heart Defects? *Pediatrics.* 2009 Aug 1;124(2):e294–9.
19. Under-Five Mortality [Internet]. UNICEF DATA. [cited 2018 Jun 11]. Available from: [//data.unicef.org/topic/child-survival/under-five-mortality/](http://data.unicef.org/topic/child-survival/under-five-mortality/)
20. Saxton AT, Poenaru D, Ozgediz D, et al. Economic Analysis of Children’s Surgical Care in Low- and Middle-Income Countries: A Systematic Review and Analysis. *PLOS ONE.* 2016 Oct 28;11(10):e0165480.

- 1
  - 2
  - 3
  - 4
  - 5
  - 6
  - 7
  - 8
  - 9
  - 10
  - 11
  - 12
  - 13
  - 14
  - 15
  - 16
  - 17
  - 18
  - 19
  - 20
  - 21
  - 22
  - 23
  - 24
  - 25
  - 26
  - 27
  - 28
  - 29
  - 30
  - 31
  - 32
  - 33
  - 34
  - 35
  - 36
  - 37
  - 38
  - 39
  - 40
  - 41
  - 42
  - 43
  - 44
  - 45
  - 46
  - 47
  - 48
  - 49
  - 50
  - 51
  - 52
  - 53
  - 54
  - 55
  - 56
  - 57
  - 58
  - 59
  - 60
21. Debas HT, Donkor P, Gawande A, Jamison DT, Kruk ME, Mock CN, editors. Essential surgery. Third edition. Washington, DC: World Bank; 2015. 421 p. (Disease control priorities).
22. Kruk ME, Gage AD, Arsenault C, et al. High-quality health systems in the Sustainable Development Goals era: time for a revolution. *Lancet Glob Health*. 2018 Nov 1;6(11):e1196–252.
23. Finding the Invisible Child: Childhood Heart Disease and the Global Health Agenda [Internet]. Children’s HeartLink; 2015 [cited 2018 Jan 25]. Available from: <https://childrensheartlink.org/wp-content/uploads/2017/06/The-Invisible-Child-Brief-2.pdf>
24. Luboga S, Macfarlane SB, Schreeb J von, et al. Increasing Access to Surgical Services in Sub-Saharan Africa: Priorities for National and International Agencies Recommended by the Bellagio Essential Surgery Group. *PLOS Med*. 2009 Dec 22;6(12):e1000200.
25. Daenen W, Lacour-Gayet F, Aberg T, et al. Optimal Structure of a Congenital Heart Surgery Department in Europe: by EACTS Congenital Heart Disease Committee<sup>1</sup>. *Eur J Cardiothorac Surg*. 2003 Sep 1;24(3):343–51.
26. Xiang L, Su Z, Liu Y, et al. Effect of family socioeconomic status on the prognosis of complex congenital heart disease in children: an observational cohort study from China. *Lancet Child Adolesc Health*. 2018 Jun 1;2(6):430–9.

## Figure Legends

Figure 1. This graph shows negative correlation of GDP per capita on the x-axis and SMR on the y-axis by country.

Figure 2. This graph shows negative correlation of Health Expenditure per capita on the x-axis and SMR on the y-axis by country.

Figure 3. This graph shows positive correlation of Poverty Ratio at \$5.50 a day on the x-axis and SMR on the y-axis by country.

Figure 4. This graph shows a negative correlation of Surgical Specialist Workforce on the x-axis and SMR on the y-axis by country.

Online Supplemental Figure 1. This bar graph shows the number of congenital heart surgery cases in each country. The label lists the number of cases and the percentage of the total cases for each country.

Online Supplemental Figure 2. This graph shows the age distribution of congenital heart surgery cases by country. Each row adds to 100%, and consists of each age category as a unique color.

Online Supplemental Figure 3. This graph shows the RACHS category distribution of congenital heart surgery cases by country. Each row adds to 100%, and consists of each RACHS category as a unique color. Online Supplemental Figure 4. This bar graph shows the unadjusted (observed) mortality rate for congenital heart surgery on the left y-axis and the Standardized Mortality Ratio (SMR) calculated using the RACHS model on the right y-axis. The x-axis show each country from lowest to highest number of cases.

Online Supplemental Figure 5. This graph shows positive correlation of Prevalence of Undernourishment on the x-axis and SMR on the y-axis by country.

Online Supplemental Figure 6. This graph shows positive correlation of Under-5 Mortality Rate on the x-axis and SMR on the y-axis by country.

Online Supplemental Figure 7. This graph shows negative correlation of Life Expectancy on the x-axis and SMR on the y-axis by country.

Online Supplemental Figure 8. This graph shows negative correlation of Domestic General Government Health Expenditure (% of GDP) on the x-axis and SMR on the y-axis by country.

1  
2  
3  
4  
5  
6  
7  
8  
9  
10  
11  
12  
13  
14  
15  
16  
17  
18  
19  
20  
21  
22  
23  
24  
25  
26  
27  
28  
29  
30  
31  
32  
33  
34  
35  
36  
37  
38  
39  
40  
41  
42  
43  
44  
45  
46  
47  
48  
49  
50  
51  
52  
53  
54  
55  
56  
57  
58  
59  
60

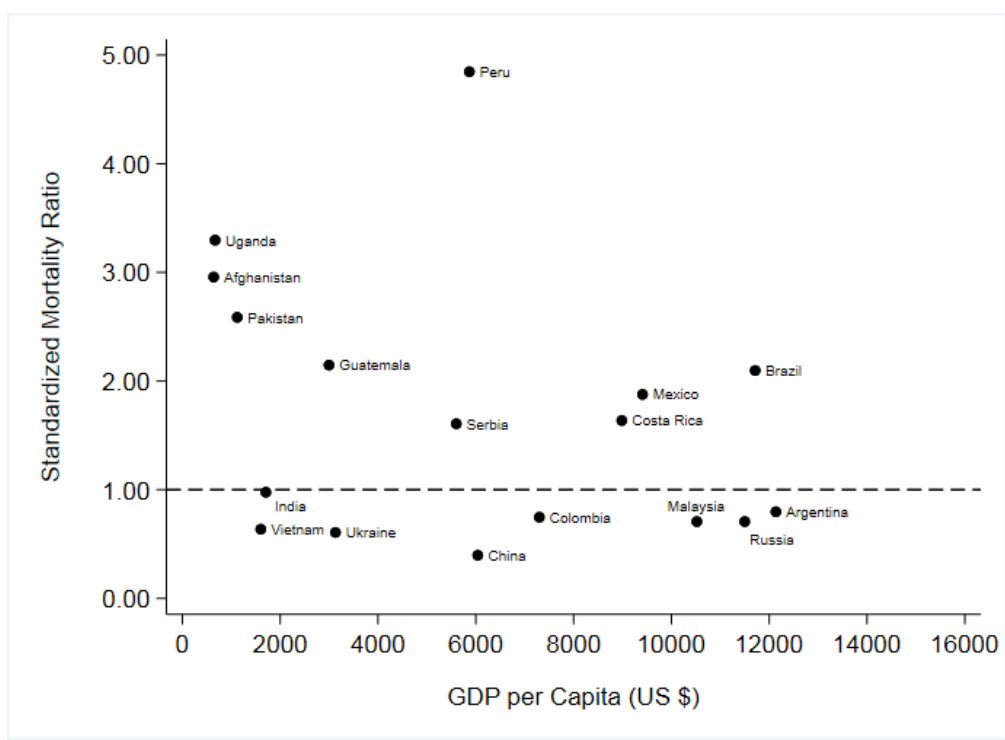

This graph shows negative correlation of GDP per capita on the x-axis and SMR on the y-axis by country.

1  
2  
3  
4  
5  
6  
7  
8  
9  
10  
11  
12  
13  
14  
15  
16  
17  
18  
19  
20  
21  
22  
23  
24  
25  
26  
27  
28  
29  
30  
31  
32  
33  
34  
35  
36  
37  
38  
39  
40  
41  
42  
43  
44  
45  
46  
47  
48  
49  
50  
51  
52  
53  
54  
55  
56  
57  
58  
59  
60

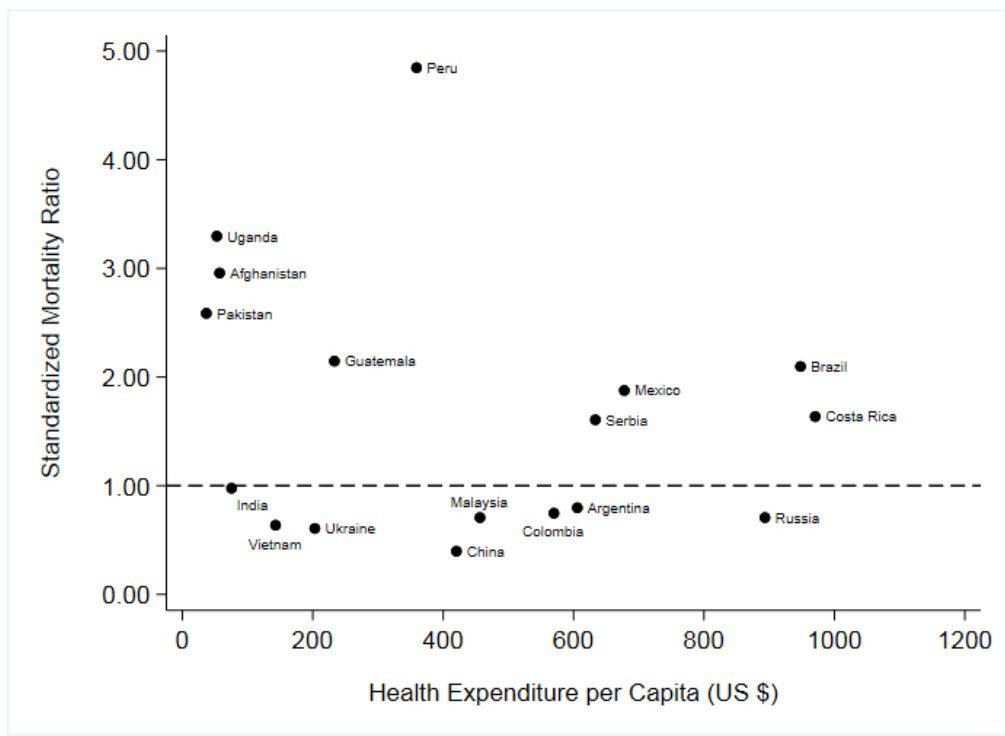

This graph shows negative correlation of Health Expenditure per capita on the x-axis and SMR on the y-axis by country.



1  
2  
3  
4  
5  
6  
7  
8  
9  
10  
11  
12  
13  
14  
15  
16  
17  
18  
19  
20  
21  
22  
23  
24  
25  
26  
27  
28  
29  
30  
31  
32  
33  
34  
35  
36  
37  
38  
39  
40  
41  
42  
43  
44  
45  
46  
47  
48  
49  
50  
51  
52  
53  
54  
55  
56  
57  
58  
59  
60

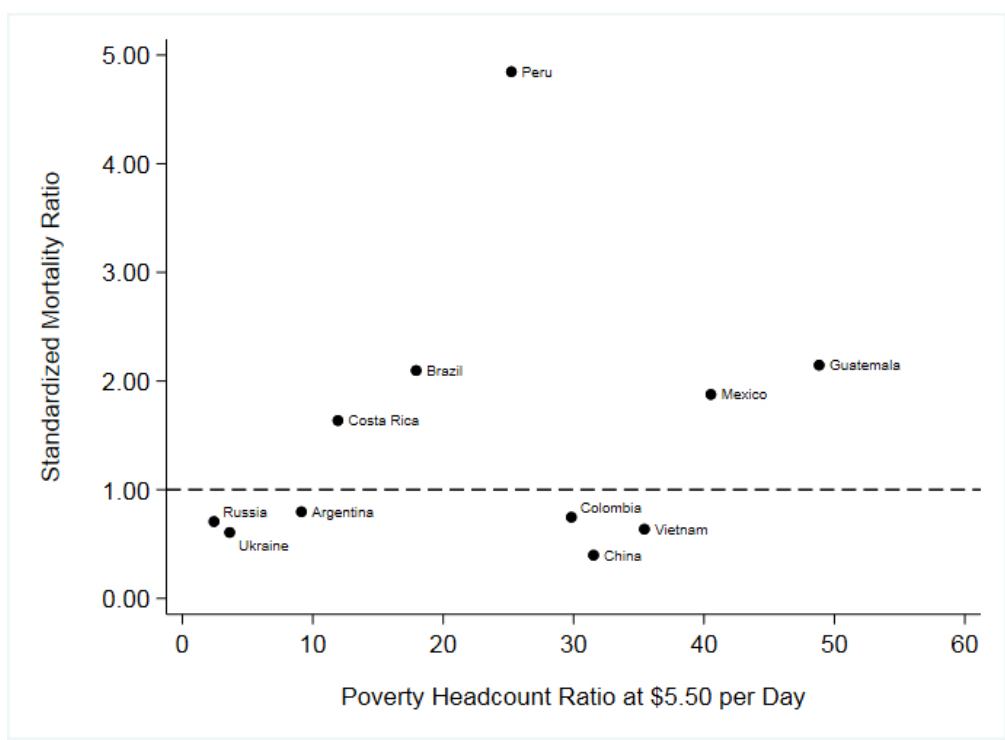

This graph shows positive correlation of Poverty Ratio at \$5.50 a day on the x-axis and SMR on the y-axis by country.

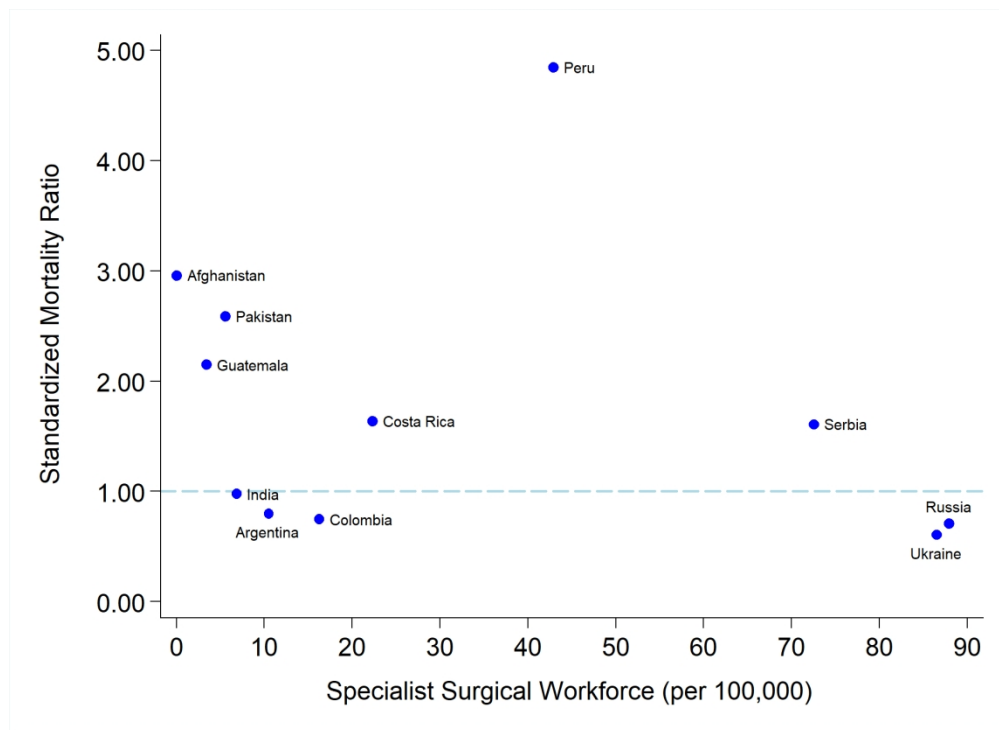

This graph shows a negative correlation of Surgical Specialist Workforce on the x-axis and SMR on the y-axis by country.

## Online Supplementary Figures and Tables

### Online Supplementary Table 1. Full RACHS Model

#### Cases Eligible for RACHS and Assigned to a Risk Category

|                                             | Odds Ratio | 95% Confidence Interval | P Value |
|---------------------------------------------|------------|-------------------------|---------|
| <b>RACHS Risk Category</b>                  |            |                         |         |
| 1                                           | 1.0        | -                       | -       |
| 2                                           | 2.3        | (1.7, 3.2)              | <0.001  |
| 3                                           | 6.7        | (5.0, 9.1)              | <0.001  |
| 4                                           | 9.5        | (6.8, 13.1)             | <0.001  |
| 5 + 6                                       | 43.6       | (28.2, 67.6)            | <0.001  |
| <b>Age at Surgery</b>                       |            |                         |         |
| ≤30 days                                    | 3.2        | (2.6, 3.9)              | <0.001  |
| 31 days to <1 year                          | 1.6        | (1.4, 1.8)              | <0.001  |
| 1 to 17 years                               | 1.0        | -                       | -       |
| <b>Prematurity</b>                          | 1.4        | (1.1, 1.7)              | 0.007   |
| <b>Major Non-Cardiac Structural Anomaly</b> | 2.0        | (1.5, 2.6)              | <0.001  |
| <b>Multiple Cardiac Procedures</b>          | 1.0        | (0.9, 1.2)              | 0.80    |

C statistic for this model is 0.75.

Online Supplementary Figure 1. Congenital Heart Surgery Cases by Country

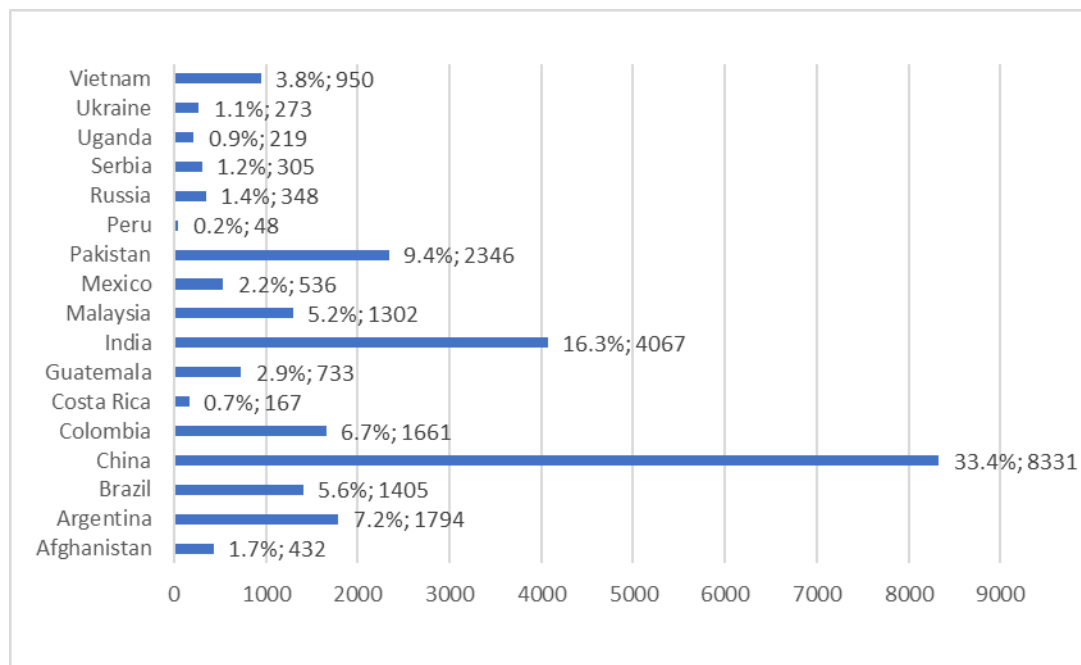

Online Supplemental Figure 2. Age Distribution of Cases by Country

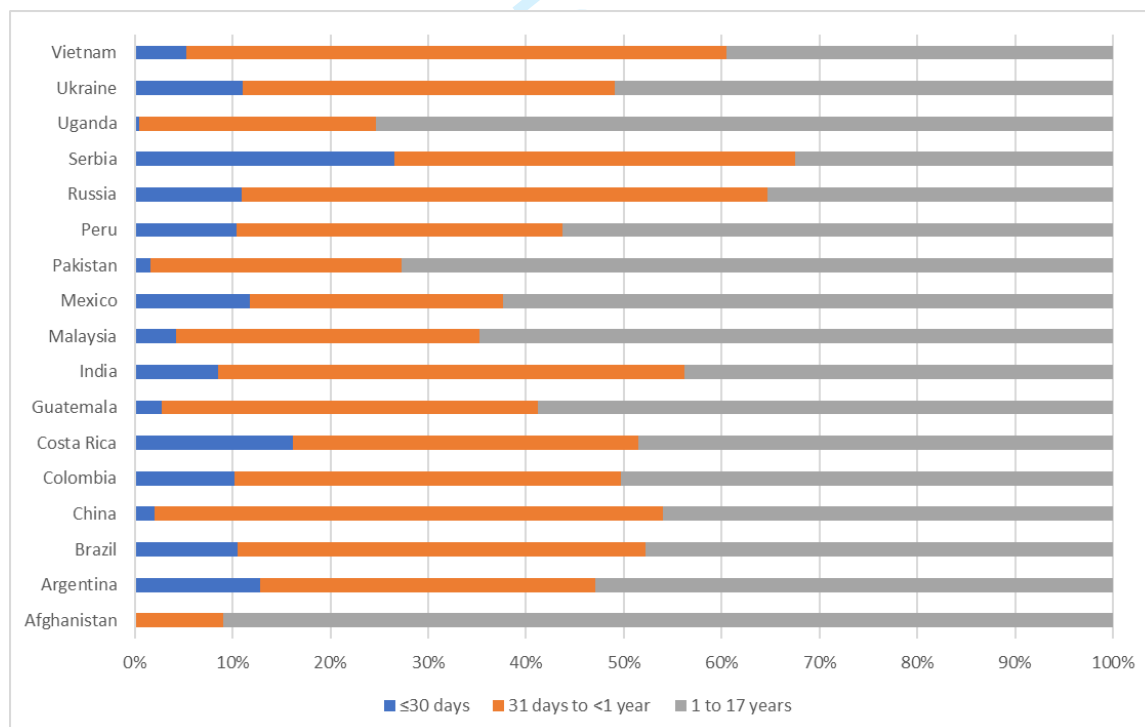

Online Supplementary Figure 3. RACHS Category Distribution by Country

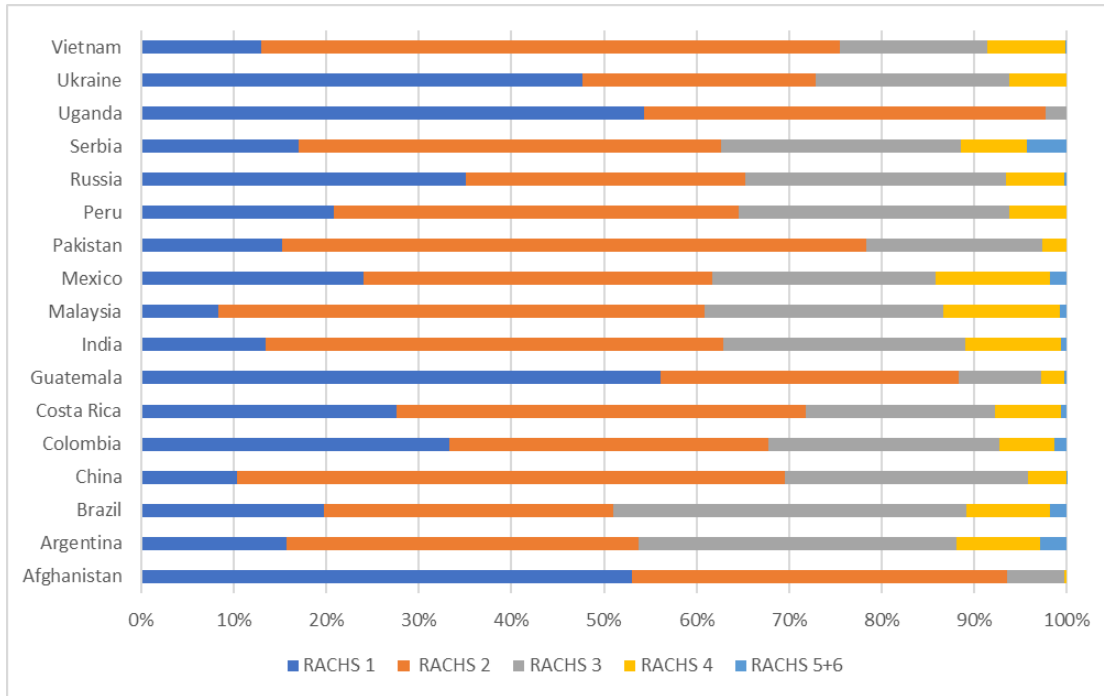

Online Supplemental Figure 4. Congenital Heart Surgery Unadjusted Mortality Rate and Standardized

Mortality Ratio by Country

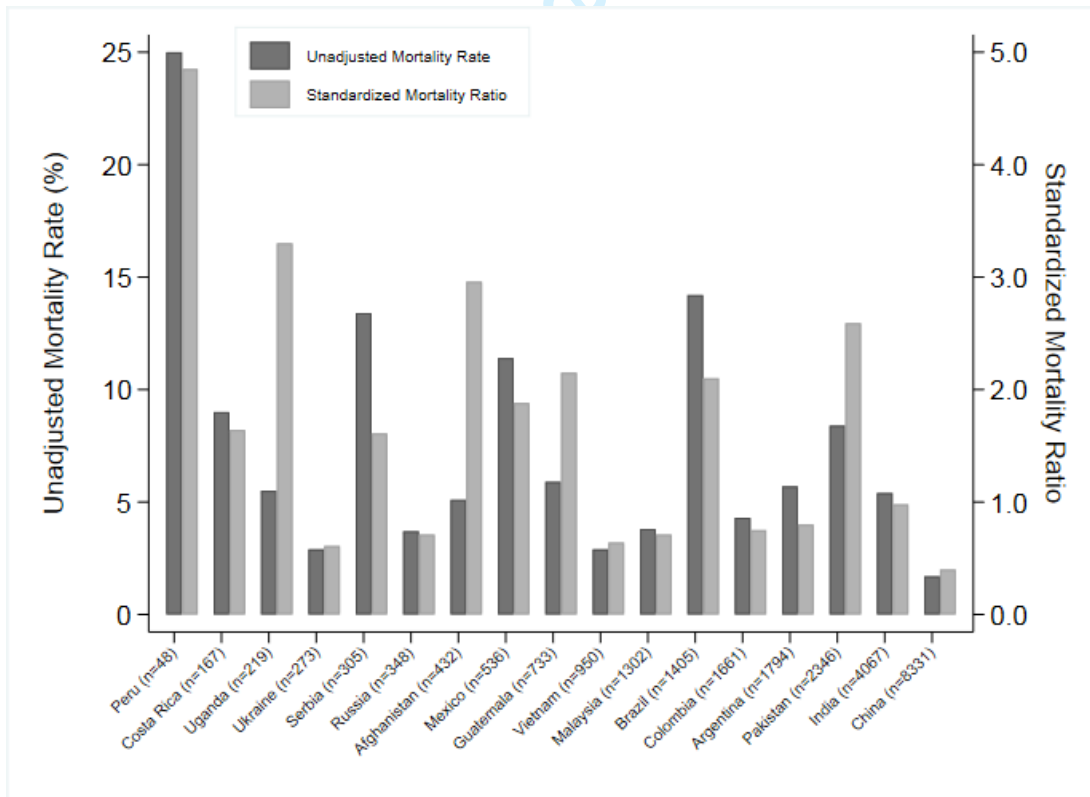

Online Supplemental Figure 5. Undernourishment and SMR

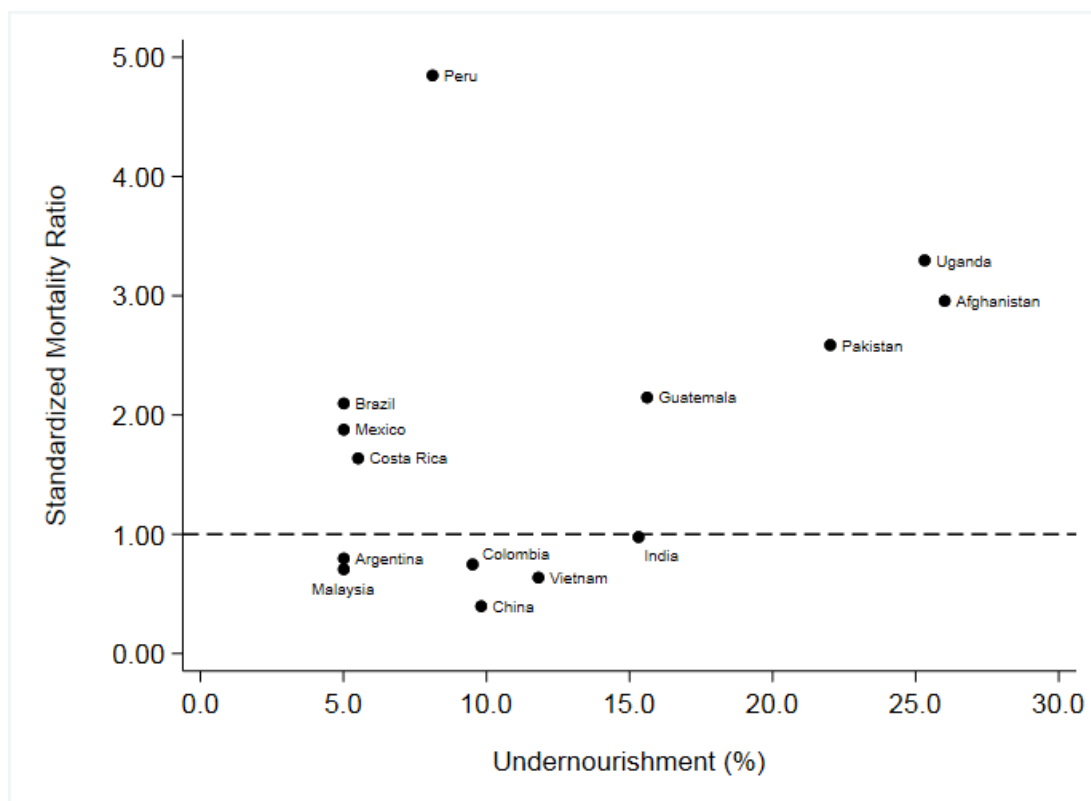

Online Supplemental Figure 6. Under-5 Mortality Rate and SMR

1  
2  
3  
4  
5  
6  
7  
8  
9  
10  
11  
12  
13  
14  
15  
16  
17  
18  
19  
20  
21  
22  
23  
24  
25  
26  
27  
28  
29  
30  
31  
32  
33  
34  
35  
36  
37  
38  
39  
40  
41  
42  
43  
44  
45  
46  
47  
48  
49  
50  
51  
52  
53  
54  
55  
56  
57  
58  
59  
60

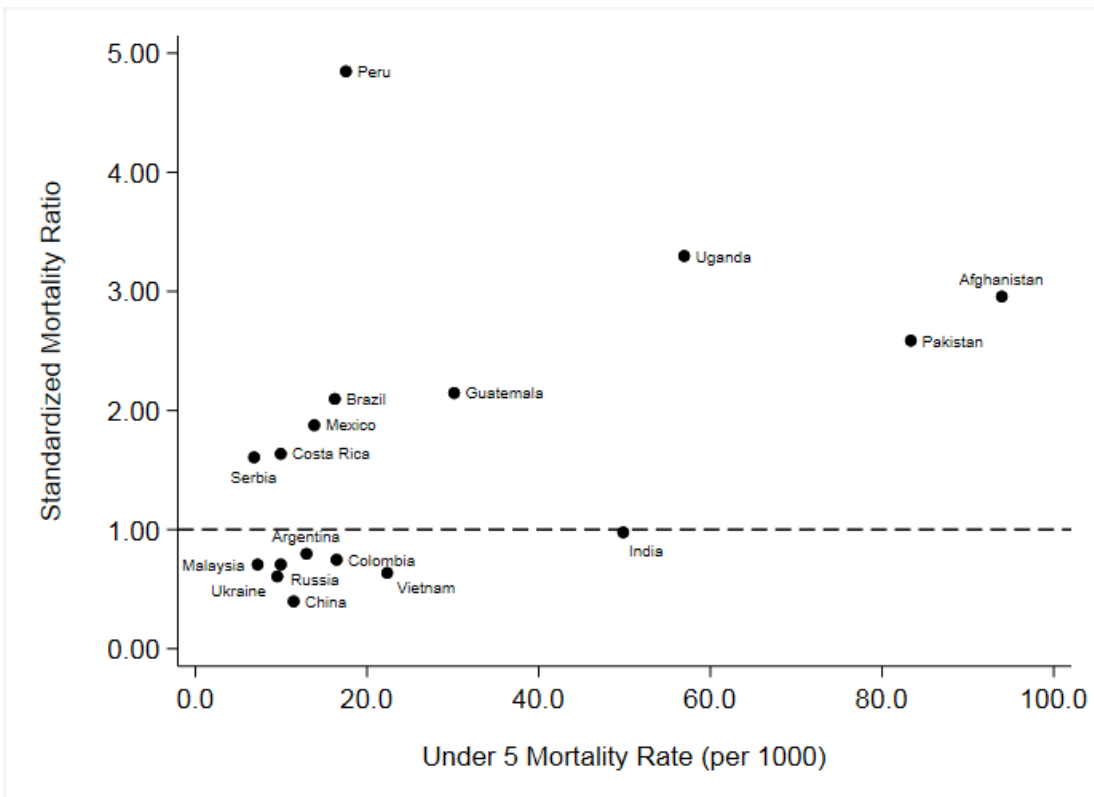

Online Supplemental Figure 7. Life Expectancy and SMR

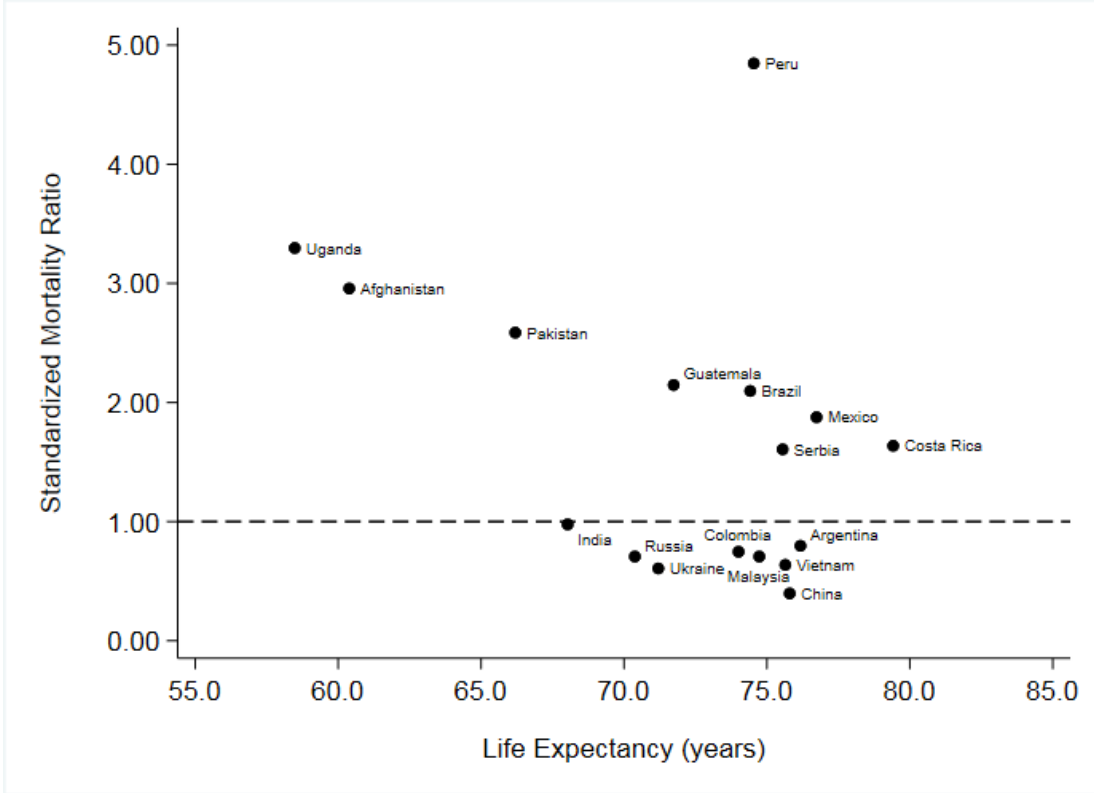

### Online Supplemental Figure 8. Domestic General Government Health Expenditure and SMR

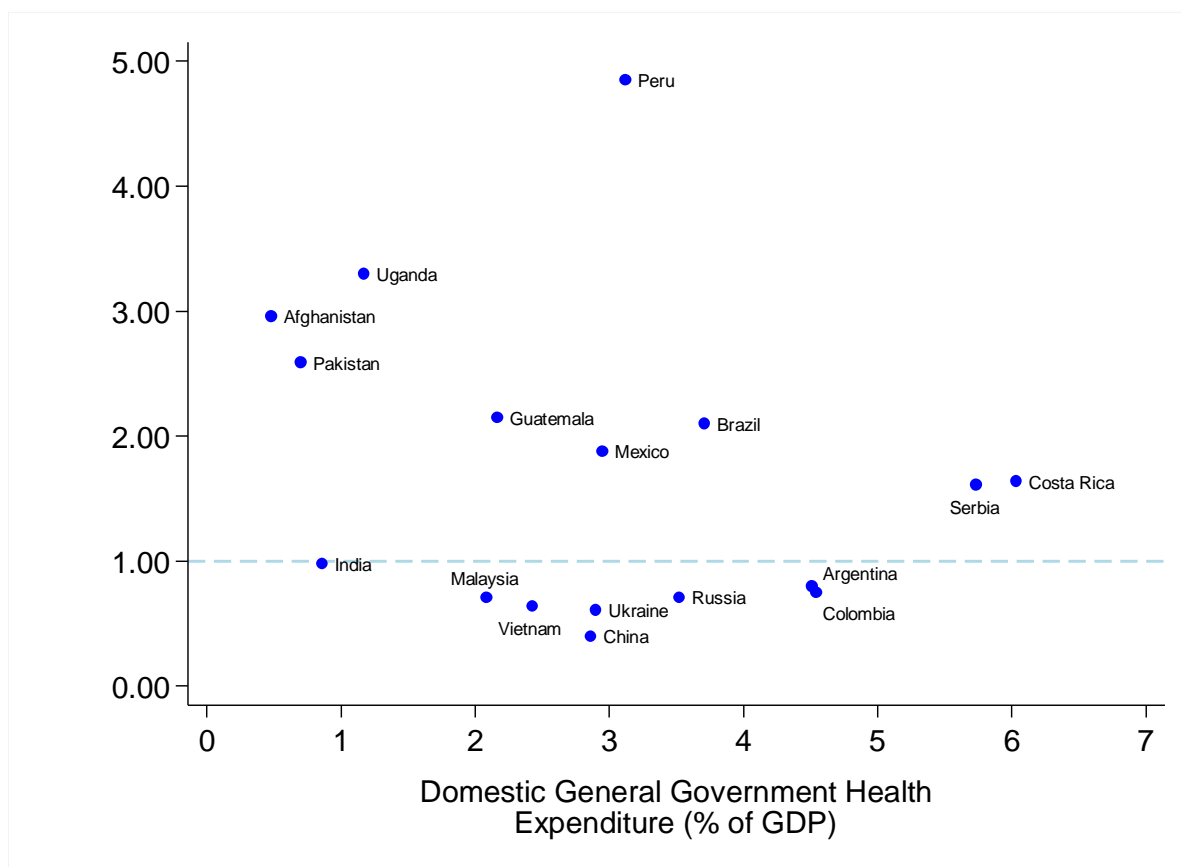

#### Online Supplemental Figure Legends

Online Supplemental Figure 1. This bar graph shows the number of congenital heart surgery cases in each country. The label lists the number of cases and the percentage of the total cases for each country.

Online Supplemental Figure 2. This graph shows the age distribution of congenital heart surgery cases by country. Each row adds to 100%, and consists of each age category as a unique color.

Online Supplemental Figure 3. This graph shows the RACHS category distribution of congenital heart surgery cases by country. Each row adds to 100%, and consists of each RACHS category as a unique color.

Online Supplemental Figure 4. This bar graph shows the unadjusted (observed) mortality rate for congenital heart surgery on the left y-axis and the Standardized Mortality Ratio (SMR) calculated using the RACHS model on the right y-axis. The x-axis show each country from lowest to highest number of cases.

Online Supplemental Figure 5. This graph shows positive correlation of Prevalence of Undernourishment on the x-axis and SMR on the y-axis by country.



1  
2  
3 Online Supplemental Figure 6. This graph shows positive correlation of Under-5 Mortality Rate on the x-  
4 axis and SMR on the y-axis by country.  
5

6 Online Supplemental Figure 7. This graph shows negative correlation of Life Expectancy on the x-axis  
7 and SMR on the y-axis by country.  
8

9 Online Supplemental Figure 8. This graph shows negative correlation of Domestic General Government  
10 Health Expenditure (% of GDP) on the x-axis and SMR on the y-axis by country.  
11  
12  
13  
14  
15  
16  
17  
18  
19  
20  
21  
22  
23  
24  
25  
26  
27  
28  
29  
30  
31  
32  
33  
34  
35  
36  
37  
38  
39  
40  
41  
42  
43  
44  
45  
46  
47  
48  
49  
50  
51  
52  
53  
54  
55  
56  
57  
58  
59  
60

**STROBE 2007 (v4) Statement—Checklist of items that should be included in reports of *cross-sectional studies***

| Section/Topic                | Item # | Recommendation                                                                                                                                                                       | Reported on page # |
|------------------------------|--------|--------------------------------------------------------------------------------------------------------------------------------------------------------------------------------------|--------------------|
| <b>Title and abstract</b>    | 1      | (a) Indicate the study's design with a commonly used term in the title or the abstract                                                                                               | 2                  |
|                              |        | (b) Provide in the abstract an informative and balanced summary of what was done and what was found                                                                                  | 2                  |
| <b>Introduction</b>          |        |                                                                                                                                                                                      |                    |
| Background/rationale         | 2      | Explain the scientific background and rationale for the investigation being reported                                                                                                 | 3                  |
| Objectives                   | 3      | State specific objectives, including any prespecified hypotheses                                                                                                                     | 3-4                |
| <b>Methods</b>               |        |                                                                                                                                                                                      |                    |
| Study design                 | 4      | Present key elements of study design early in the paper                                                                                                                              | 4                  |
| Setting                      | 5      | Describe the setting, locations, and relevant dates, including periods of recruitment, exposure, follow-up, and data collection                                                      | 5                  |
| Participants                 | 6      | (a) Give the eligibility criteria, and the sources and methods of selection of participants                                                                                          | 5                  |
| Variables                    | 7      | Clearly define all outcomes, exposures, predictors, potential confounders, and effect modifiers. Give diagnostic criteria, if applicable                                             | 5                  |
| Data sources/<br>measurement | 8*     | For each variable of interest, give sources of data and details of methods of assessment (measurement). Describe comparability of assessment methods if there is more than one group | 5                  |
| Bias                         | 9      | Describe any efforts to address potential sources of bias                                                                                                                            | 5                  |
| Study size                   | 10     | Explain how the study size was arrived at                                                                                                                                            | 5                  |
| Quantitative variables       | 11     | Explain how quantitative variables were handled in the analyses. If applicable, describe which groupings were chosen and why                                                         | 6                  |
| Statistical methods          | 12     | (a) Describe all statistical methods, including those used to control for confounding                                                                                                | 6-7                |
|                              |        | (b) Describe any methods used to examine subgroups and interactions                                                                                                                  | 6-7                |
|                              |        | (c) Explain how missing data were addressed                                                                                                                                          | Table 1            |
|                              |        | (d) If applicable, describe analytical methods taking account of sampling strategy                                                                                                   | n/a                |
|                              |        | (e) Describe any sensitivity analyses                                                                                                                                                | n/a                |
| <b>Results</b>               |        |                                                                                                                                                                                      |                    |

|                          |     |                                                                                                                                                                                                              |         |
|--------------------------|-----|--------------------------------------------------------------------------------------------------------------------------------------------------------------------------------------------------------------|---------|
| Participants             | 13* | (a) Report numbers of individuals at each stage of study—eg numbers potentially eligible, examined for eligibility, confirmed eligible, included in the study, completing follow-up, and analysed            | n/a     |
|                          |     | (b) Give reasons for non-participation at each stage                                                                                                                                                         | 5       |
|                          |     | (c) Consider use of a flow diagram                                                                                                                                                                           | n/a     |
| Descriptive data         | 14* | (a) Give characteristics of study participants (eg demographic, clinical, social) and information on exposures and potential confounders                                                                     | 5       |
|                          |     | (b) Indicate number of participants with missing data for each variable of interest                                                                                                                          | Table 1 |
| Outcome data             | 15* | Report numbers of outcome events or summary measures                                                                                                                                                         | 8       |
| Main results             | 16  | (a) Give unadjusted estimates and, if applicable, confounder-adjusted estimates and their precision (eg, 95% confidence interval). Make clear which confounders were adjusted for and why they were included | 8       |
|                          |     | (b) Report category boundaries when continuous variables were categorized                                                                                                                                    | 8       |
|                          |     | (c) If relevant, consider translating estimates of relative risk into absolute risk for a meaningful time period                                                                                             | n/a     |
| Other analyses           | 17  | Report other analyses done—eg analyses of subgroups and interactions, and sensitivity analyses                                                                                                               | 9       |
| <b>Discussion</b>        |     |                                                                                                                                                                                                              |         |
| Key results              | 18  | Summarise key results with reference to study objectives                                                                                                                                                     | 9-10    |
| Limitations              | 19  | Discuss limitations of the study, taking into account sources of potential bias or imprecision. Discuss both direction and magnitude of any potential bias                                                   | 12      |
| Interpretation           | 20  | Give a cautious overall interpretation of results considering objectives, limitations, multiplicity of analyses, results from similar studies, and other relevant evidence                                   | 13      |
| Generalisability         | 21  | Discuss the generalisability (external validity) of the study results                                                                                                                                        | 12-13   |
| <b>Other information</b> |     |                                                                                                                                                                                                              |         |
| Funding                  | 22  | Give the source of funding and the role of the funders for the present study and, if applicable, for the original study on which the present article is based                                                | 14      |

\*Give information separately for cases and controls in case-control studies and, if applicable, for exposed and unexposed groups in cohort and cross-sectional studies.

**Note:** An Explanation and Elaboration article discusses each checklist item and gives methodological background and published examples of transparent reporting. The STROBE checklist is best used in conjunction with this article (freely available on the Web sites of PLoS Medicine at <http://www.plosmedicine.org/>, Annals of Internal Medicine at <http://www.annals.org/>, and Epidemiology at <http://www.epidem.com/>). Information on the STROBE Initiative is available at [www.strobe-statement.org](http://www.strobe-statement.org).
